# Supplementary material for: Post-translational regulation and proteolytic activity of the metalloproteinase ADAMTS8
Source: PubMed Central journal article supplement (PMC8577114; doi:10.1016/j.jbc.2021.101323), 2021-10-21
Supplement: mmc1.pdf [file mmc1.pdf]

## SUPPORTING INFORMATION

### POST-TRANSLATIONAL REGULATION AND PROTEOLYTIC ACTIVITY OF THE METALLOPROTEINASE ADAMTS8

Salvatore Santamaria<sup>1,\*</sup>, Daniel R. Martin,<sup>2</sup> Xiangyi Dong<sup>1</sup>, Kazuhiro Yamamoto,<sup>3</sup> Suneel S. Apte,<sup>2</sup> and Josefin Ahnström<sup>1</sup>

From the Department of Immunology and Inflammation, Imperial College London, Du Cane Road W12 0NN, London, UK; <sup>2</sup>Department of Biomedical Engineering, Cleveland Clinic Lerner Research Institute, Cleveland OH 44195, USA; <sup>3</sup>Institute of Life Course and Medical Sciences, University of Liverpool, William Duncan Building, 6 West Derby Street, L7 8TX, Liverpool, UK.

\* to whom the correspondence should be addressed: Salvatore Santamaria, Department of Immunology and Inflammation, 5<sup>th</sup> Floor Commonwealth Building, Hammersmith Hospital Campus, Du Cane Road, W12 0NN, London, United Kingdom; [s.santamaria@imperial.ac.uk](mailto:s.santamaria@imperial.ac.uk); Tel: ++44 (0) 20 83 83 22 98

Running title: ADAMTS-8 expression and proteolytic activity

#### List:

**Supporting Figures: S1-S5**

**Supporting Tables: S1-S3**

**Fig. S1. Annotated MS/MS spectrum of ADAMTS8 autolysis peptides.** Parent ions were selected for collision-induced dissociation fragmentation at 35% collisional energy. This fragmentation creates breakages at the amino-carboxyl bond to generate a series of b-ions (which retain the original N-terminus (in blue)) and y-ions (which retain the original C-terminus (in red)). The m/z of these ions corresponds to known amino acid residues and allow confirmation of the parent ion amino acid sequence (labelled on each spectrum).

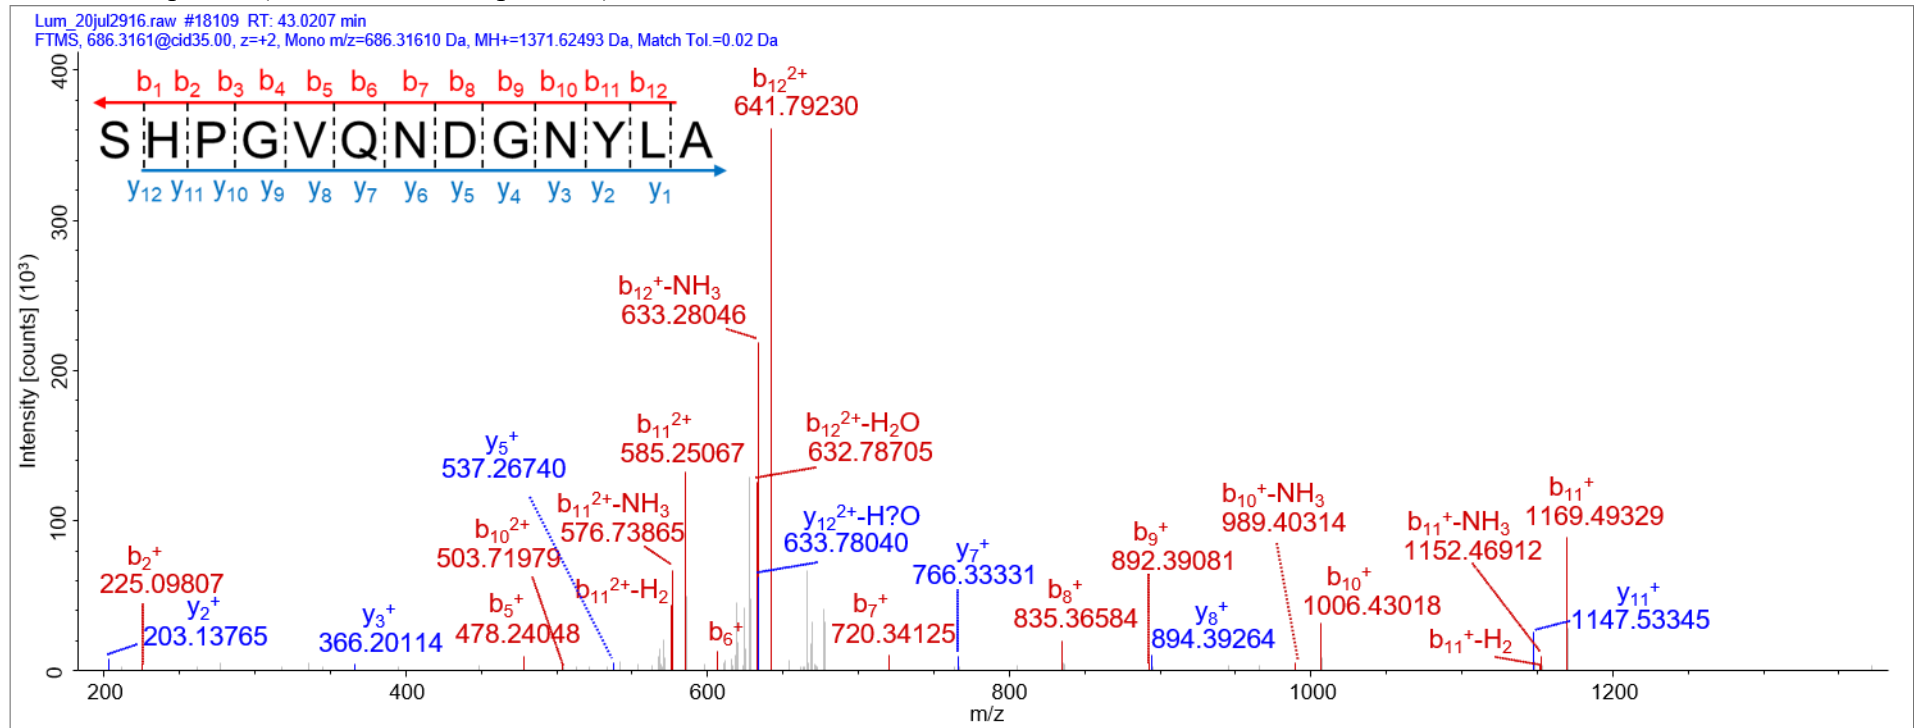

Lum\_20jul2907.raw #41499 RT: 87.5891 min  
FTMS, 899.3949@cid35.00, z=+2, Mono m/z=898.89343 Da, MH+=1796.77959 Da, Match Tol.=0.02 Da

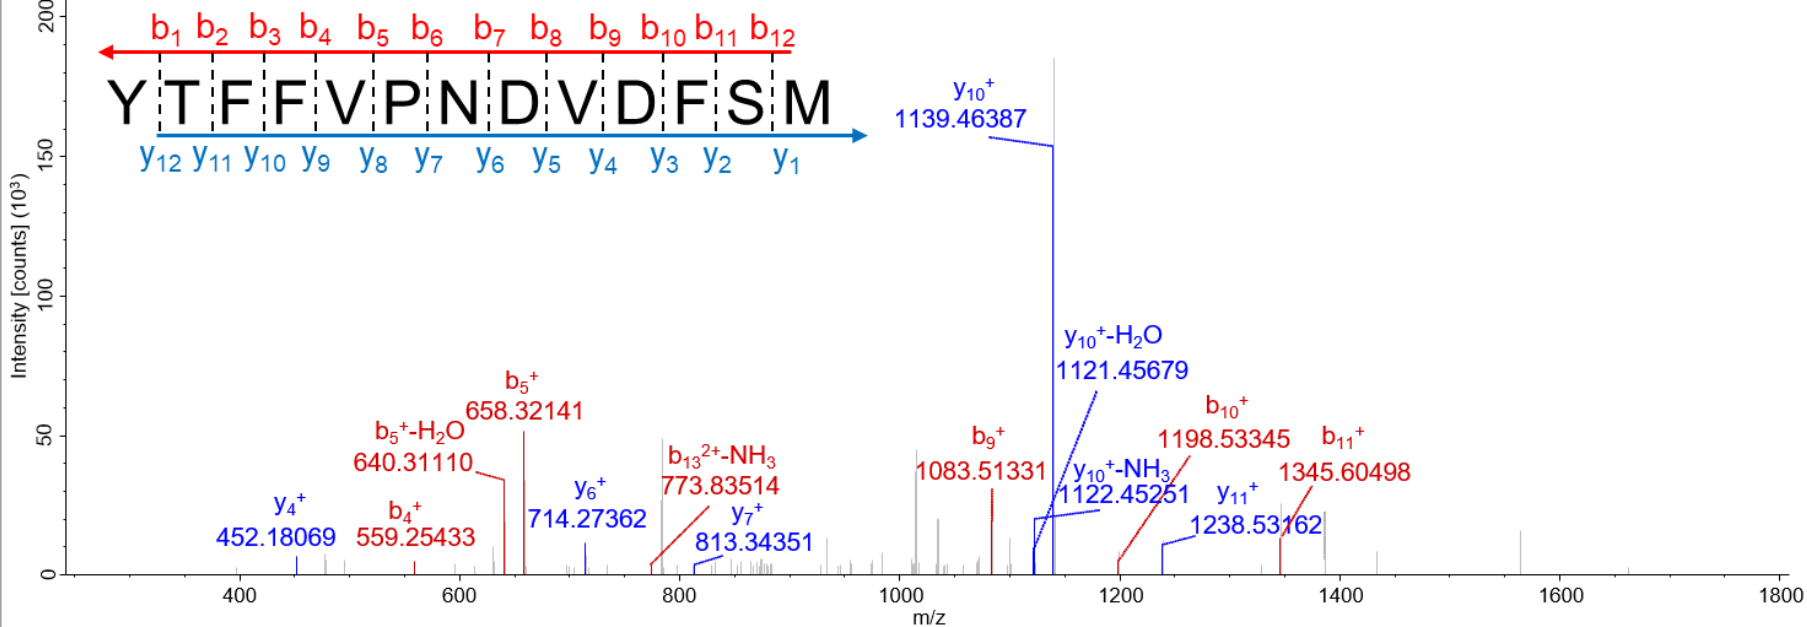

Lum\_20jul2907.raw #41499 RT: 87.5891 min  
FTMS, 899.3949@cid35.00, z=+2, Mono m/z=898.89343 Da, MH+=1796.77959 Da, Match Tol.=0.02 Da

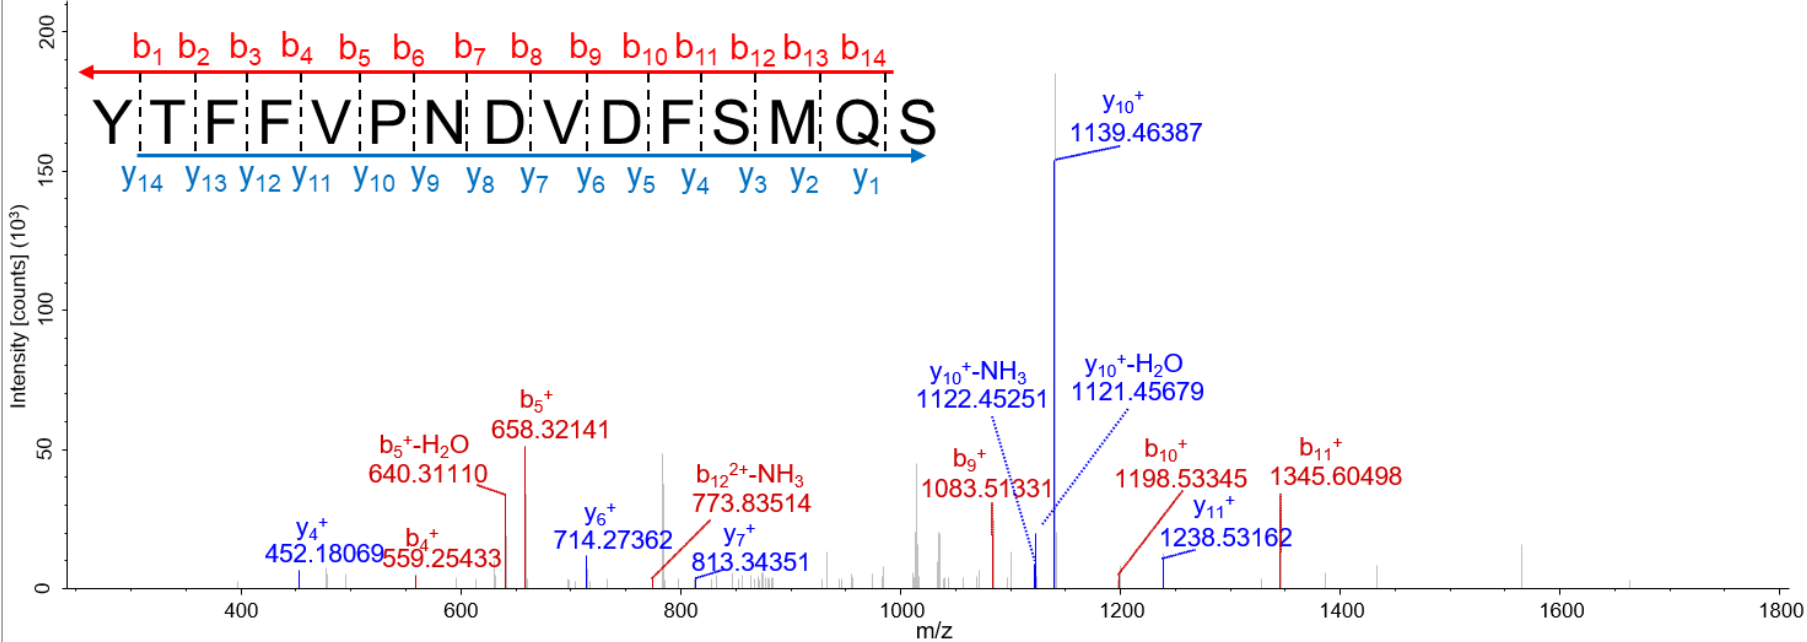

Lum\_20jul2907\_raw #40799 RT: 86.3794 min  
 FTMS, 963.0590@cid35.00, z=+2, Mono m/z=962.55798 Da, MH+=1924.10869 Da, Match Tol.=0.02 Da

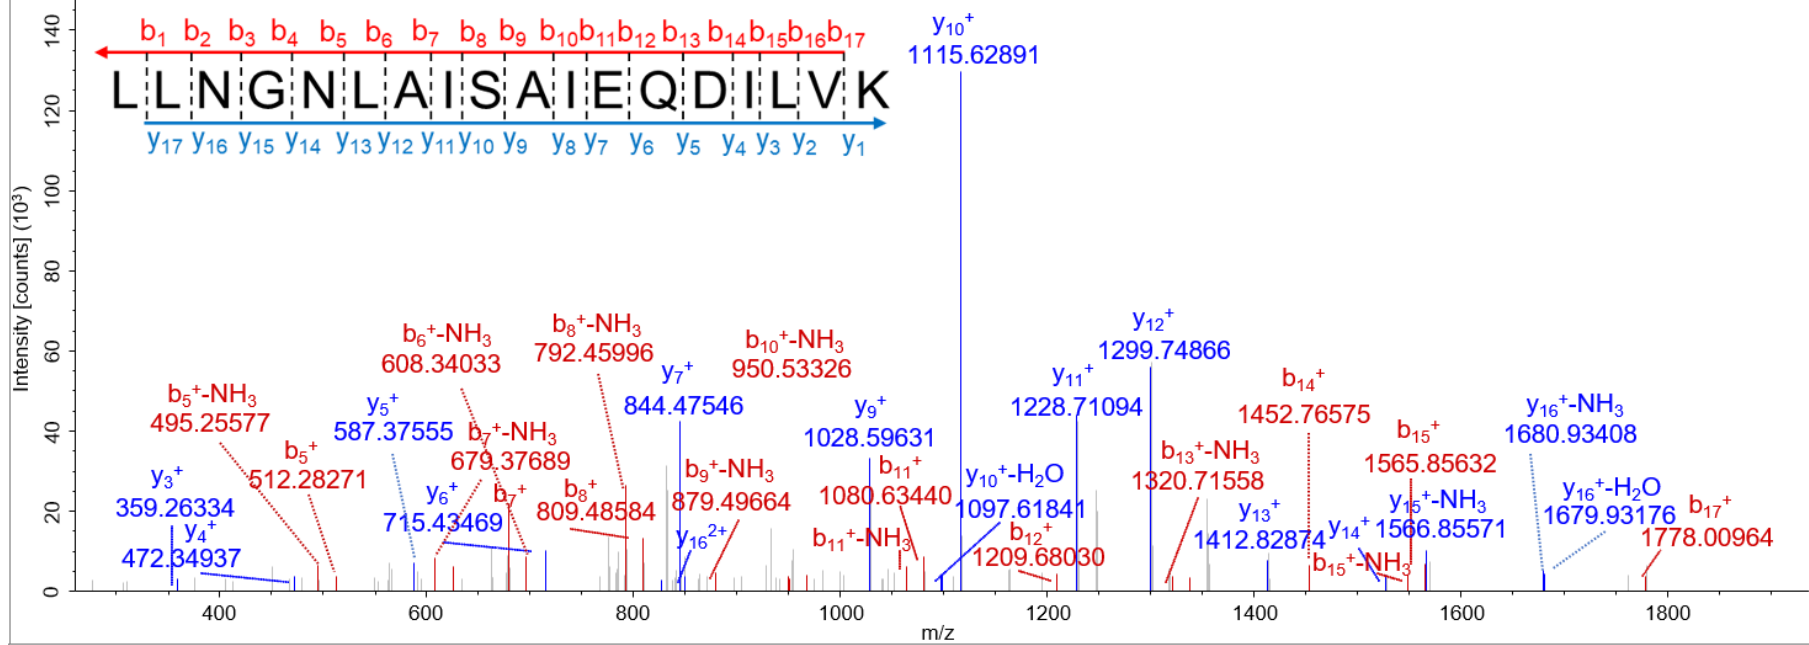

Lum\_20jul2907\_raw #40437 RT: 85.7614 min  
 FTMS, 934.1846@cid35.00, z=+3, Mono m/z=934.18463 Da, MH+=2800.53934 Da, Match Tol.=0.02 Da

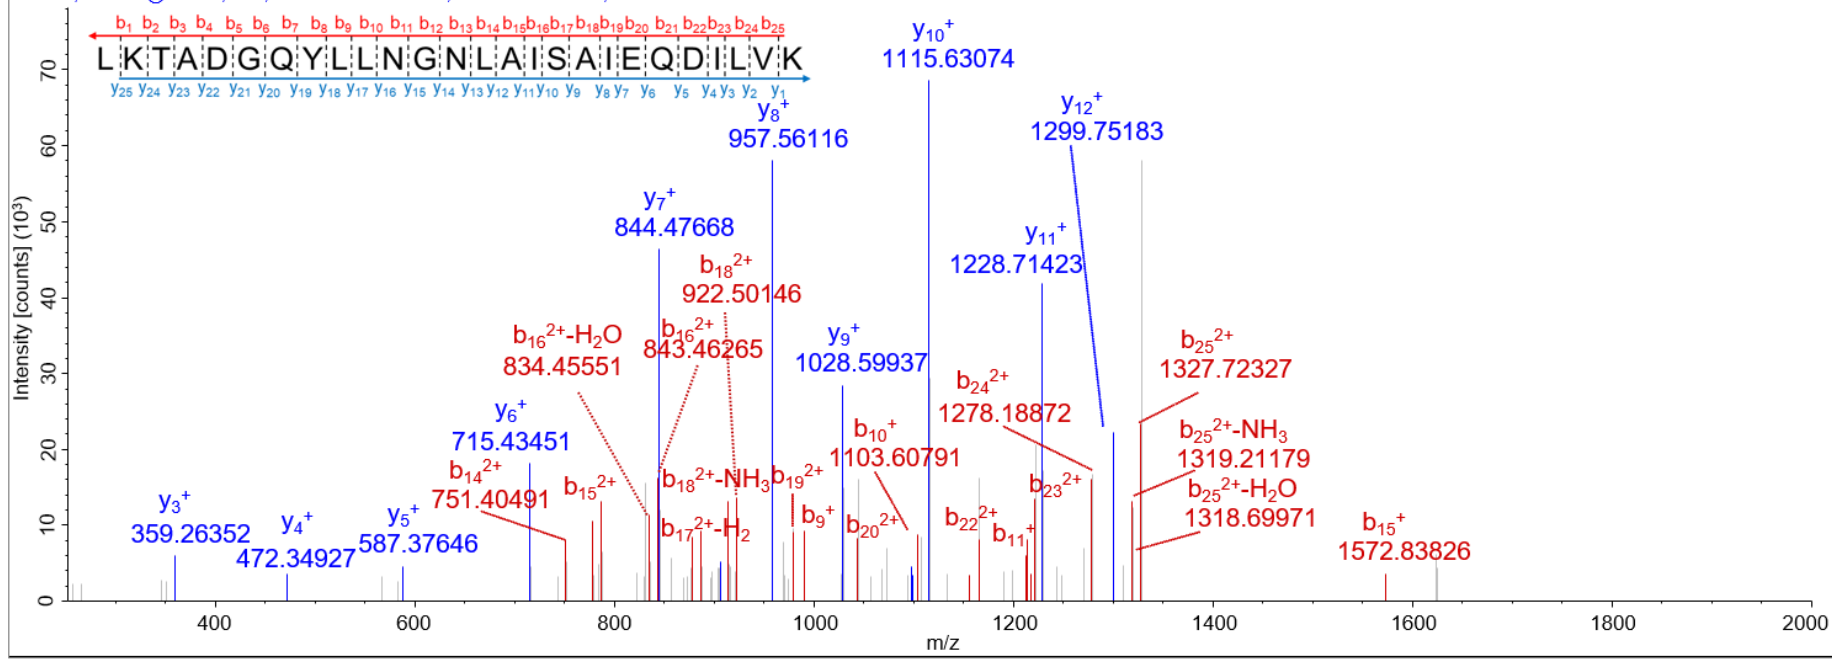

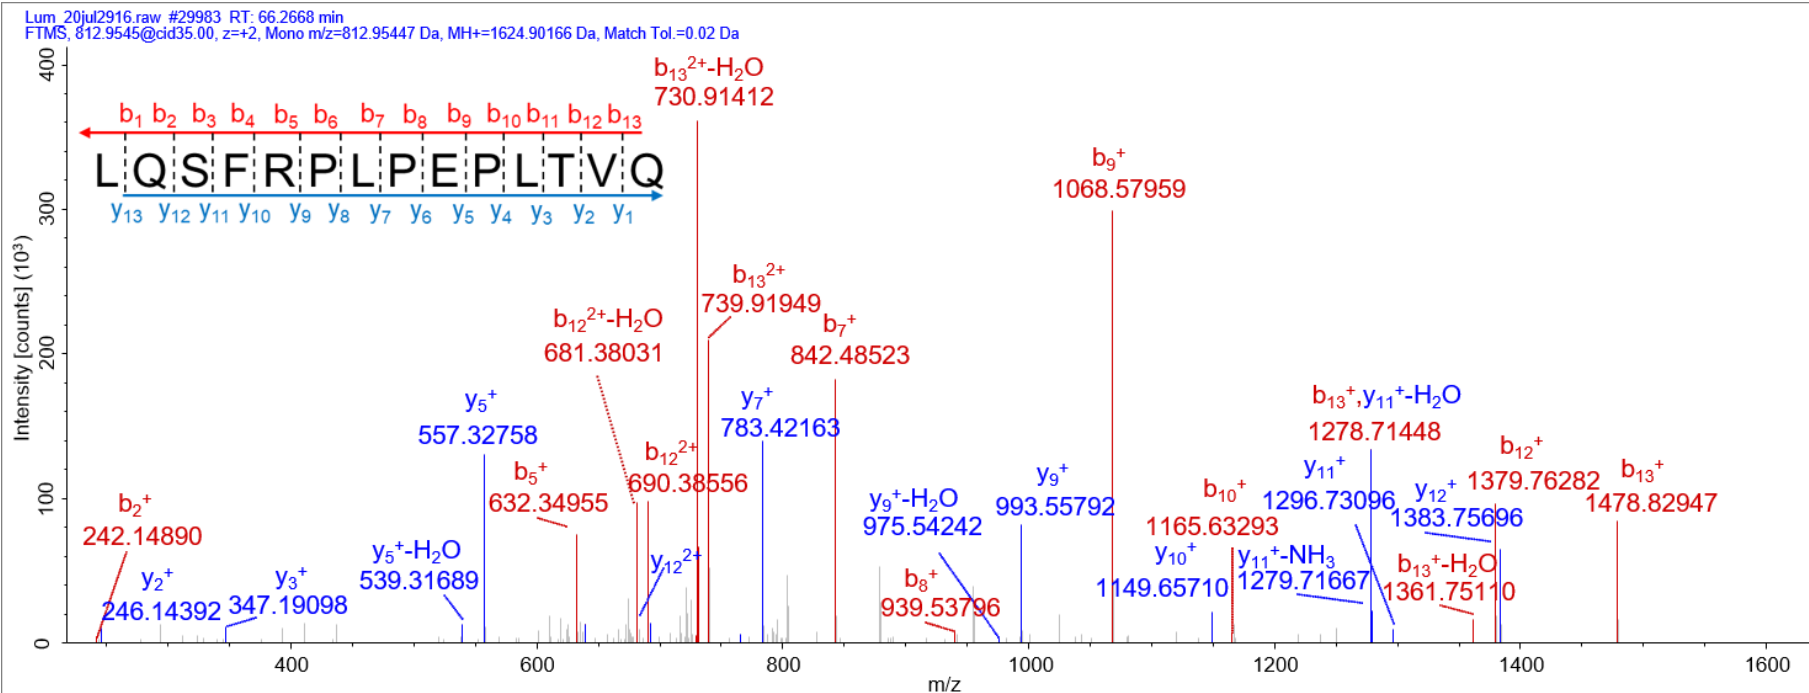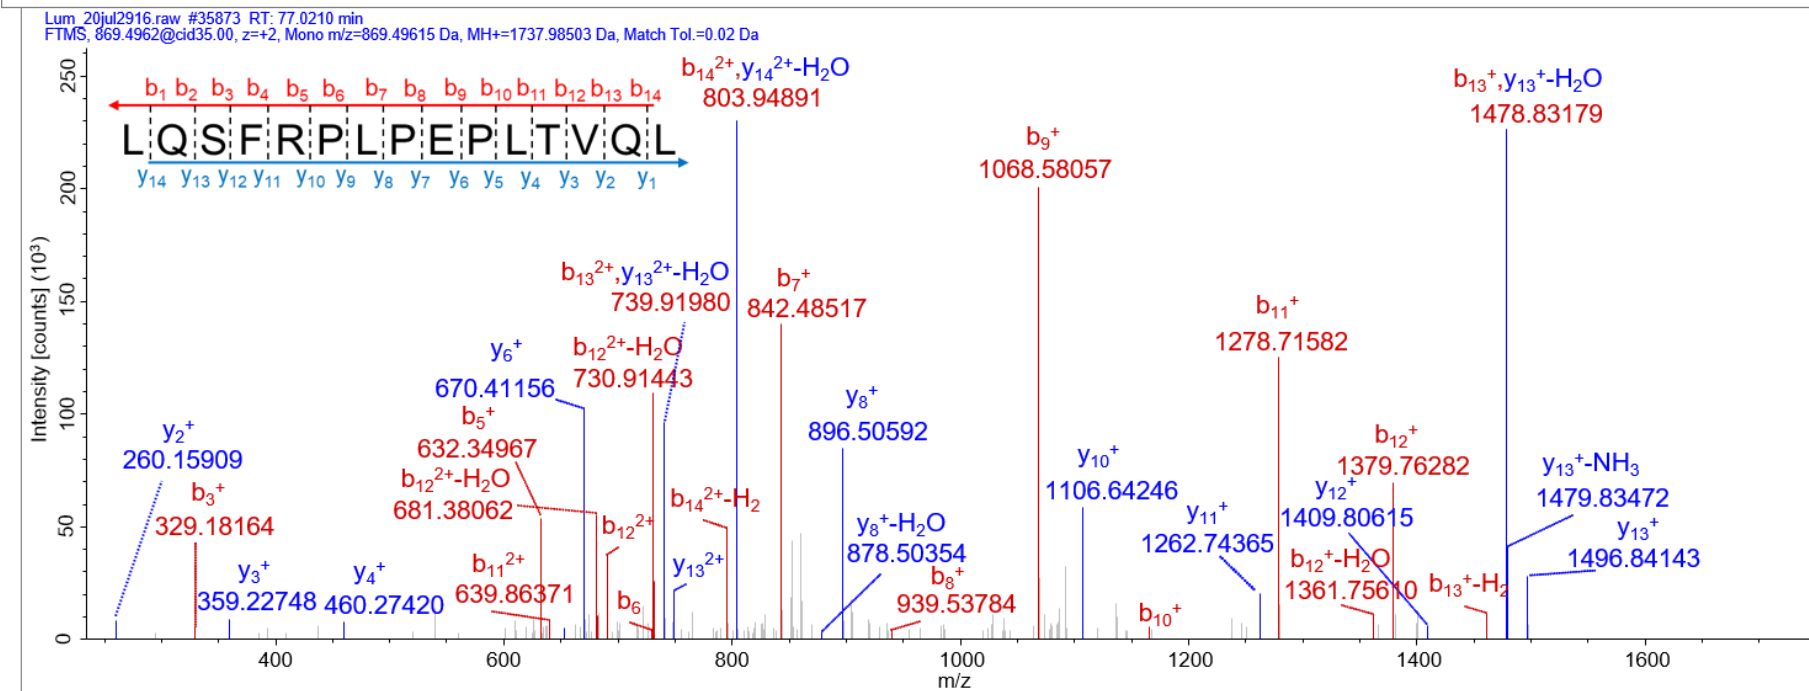

**Fig. S2. ADAMTS8 does not bind to LRP1.** Human full-length LRP1 (5 nM) was coated overnight. Wells were blocked with 3% BSA in TNC and washed in TNC-B after this and each subsequent step. Wells were then incubated with various concentrations of recombinant ADAMTS5 or ADAMTS8 (0-500 nM) in blocking solution for 3 h at room temperature (RT). Bound proteins were detected using anti-FLAG M2 antibody and then with a secondary antibody coupled to HRP. Hydrolysis of tetramethylbenzidine substrate was measured at 450 nm. Each value was normalized by subtracting the amount of recombinant protein bound to control well that was not coated with LRP1.

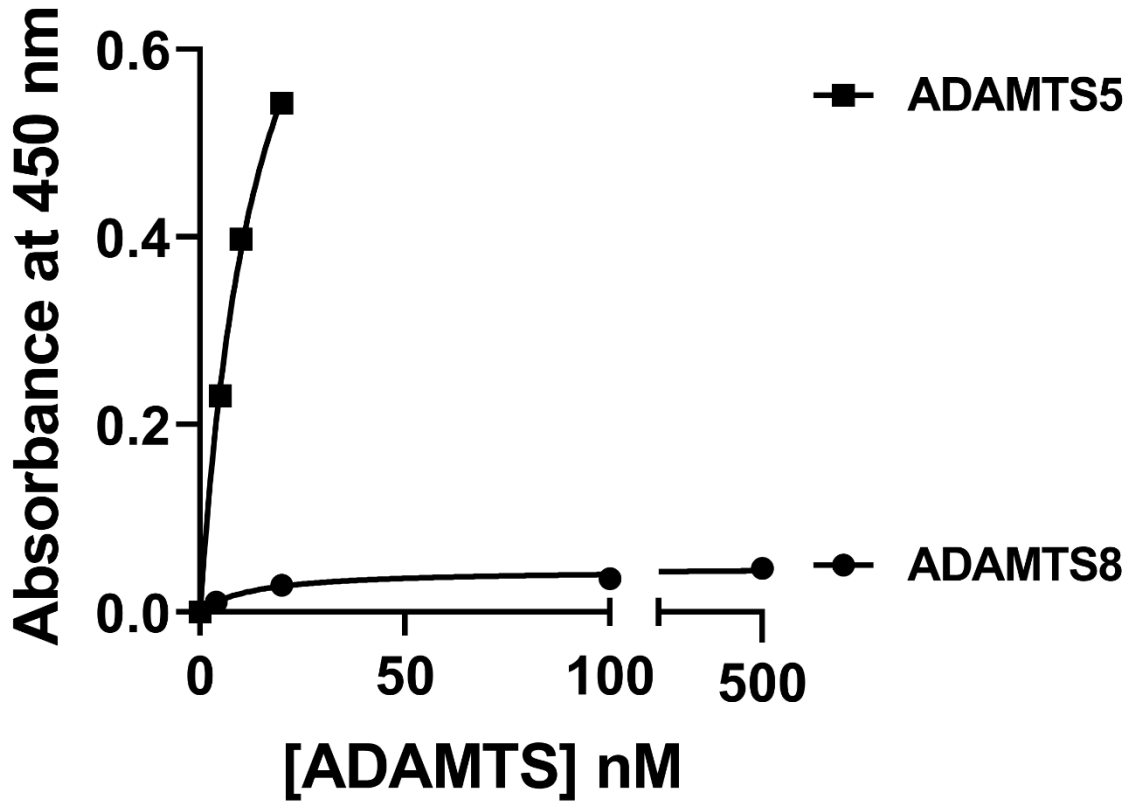

**Fig. S3. Annotated MS/MS spectra of ADAMTS8 derived peptides from the 2-hour OPN digestion.** Parent ions were selected for collision-induced dissociation fragmentation at 35% collisional energy. This fragmentation creates breakages at the amino-carboxyl bond to generate a series of b-ions (which retain the original N-terminus, in blue) and y-ions (which retain the original C-terminus, in red)). The m/z of the b/y ions corresponds to known amino acid residues or amino acid ensembles, providing the parent ion amino acid sequence (labelled on each spectrum).

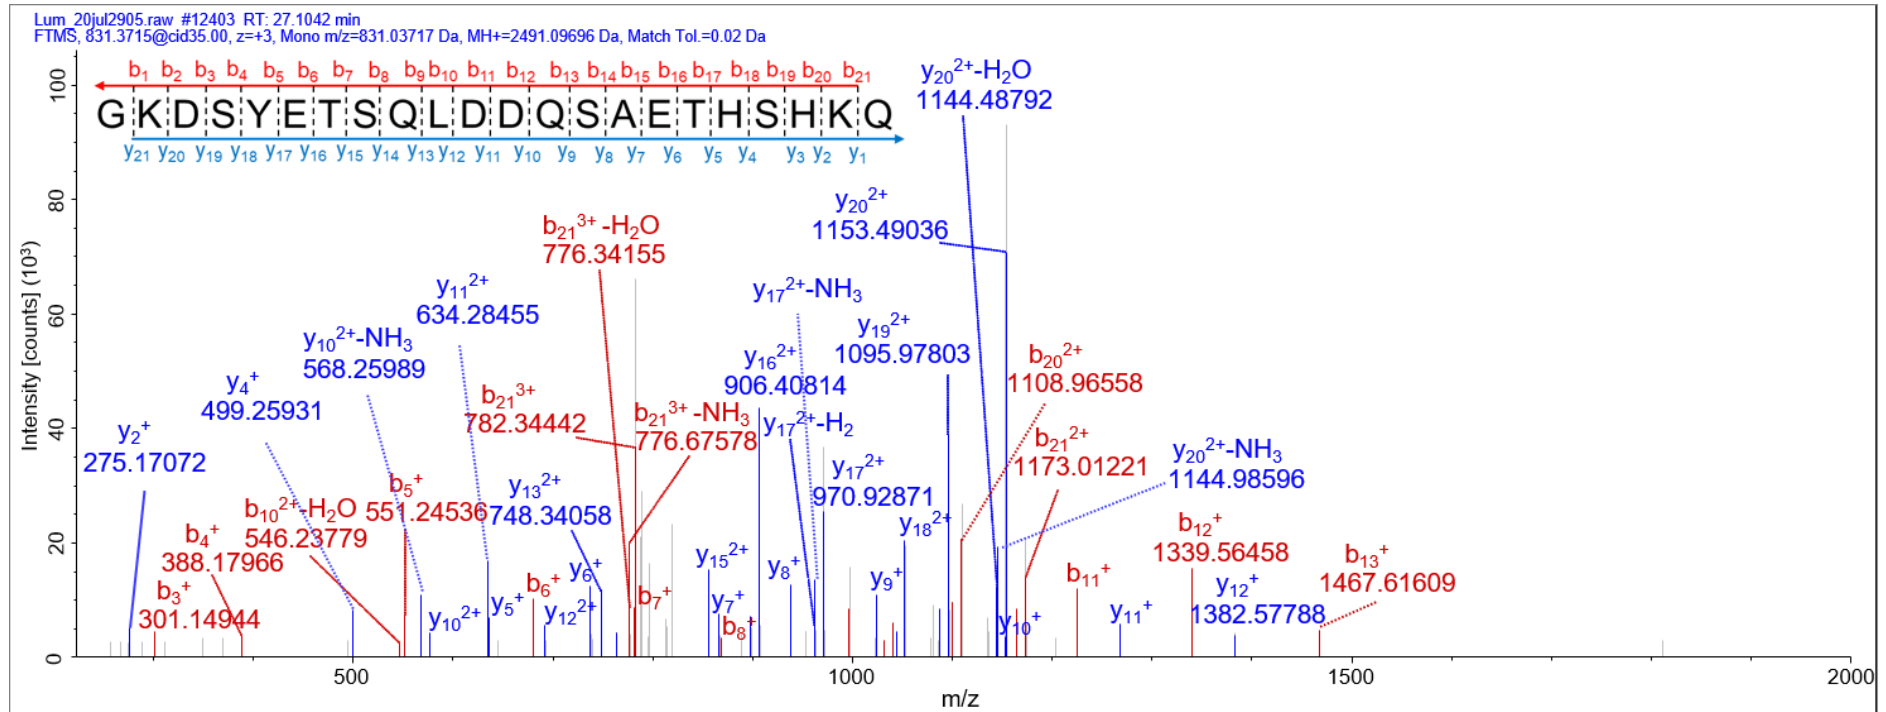

Lum\_20jul2906.raw #14677 RT: 30.3107 min  
FTMS, 448.7147@cid35.00, z=+2, Mono m/z=448.71469 Da, MH+=896.42211 Da, Match Tol.=0.02 Da

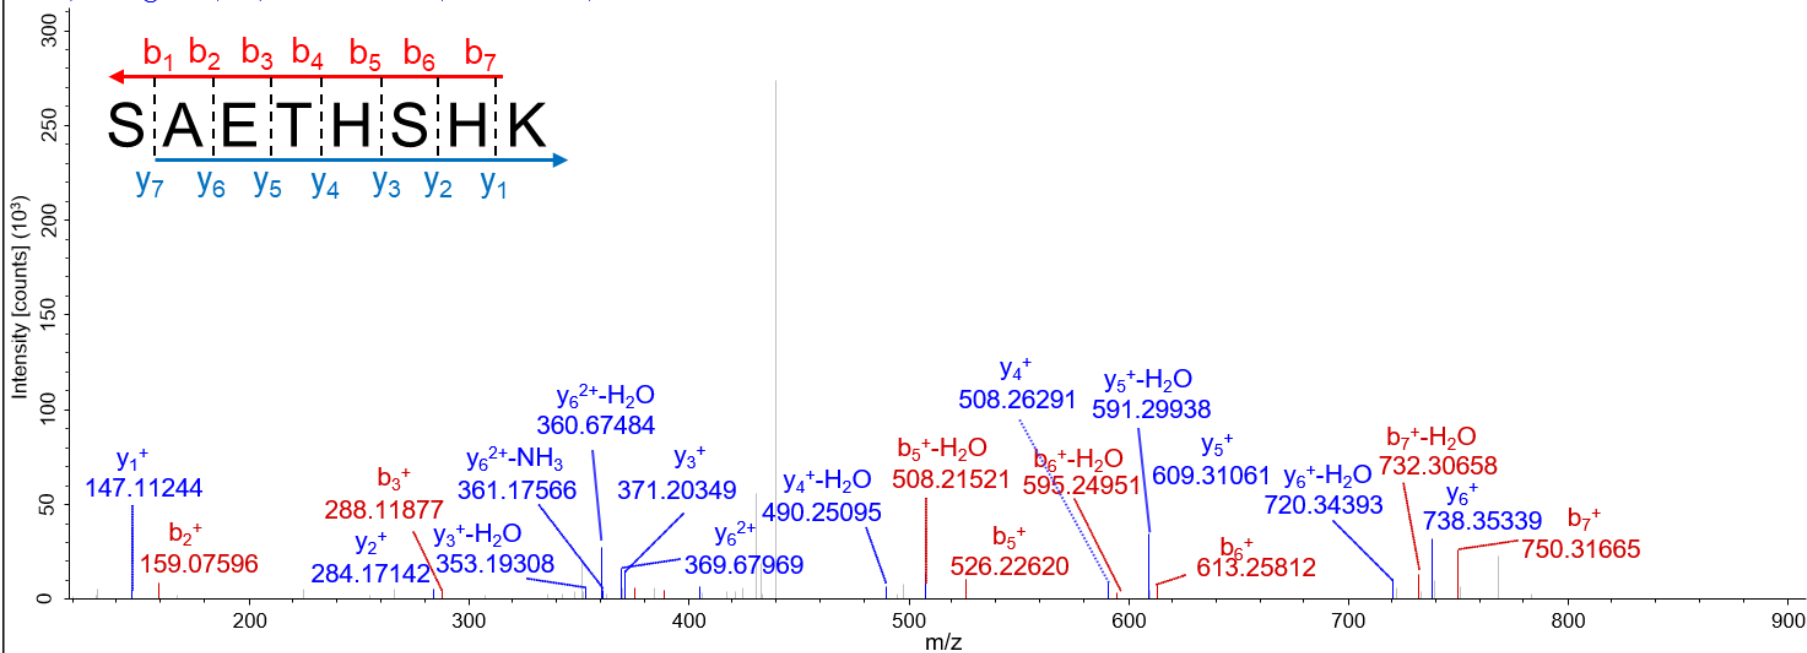

Lum\_20jul2905.raw #12490 RT: 27.2554 min  
FTMS, 570.2568@cid35.00, z=+2, Mono m/z=570.25677 Da, MH+=1139.50627 Da, Match Tol.=0.02 Da

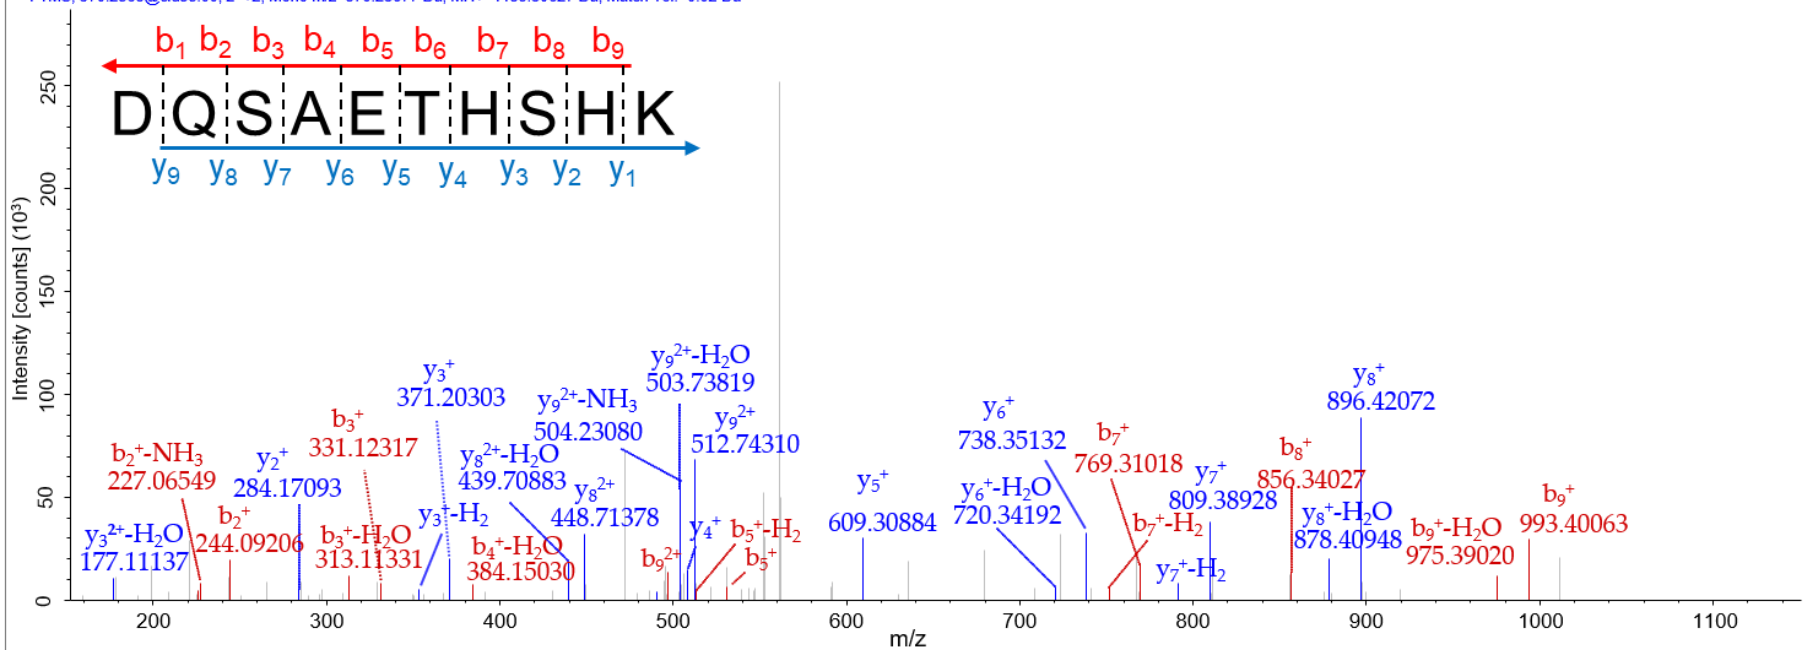



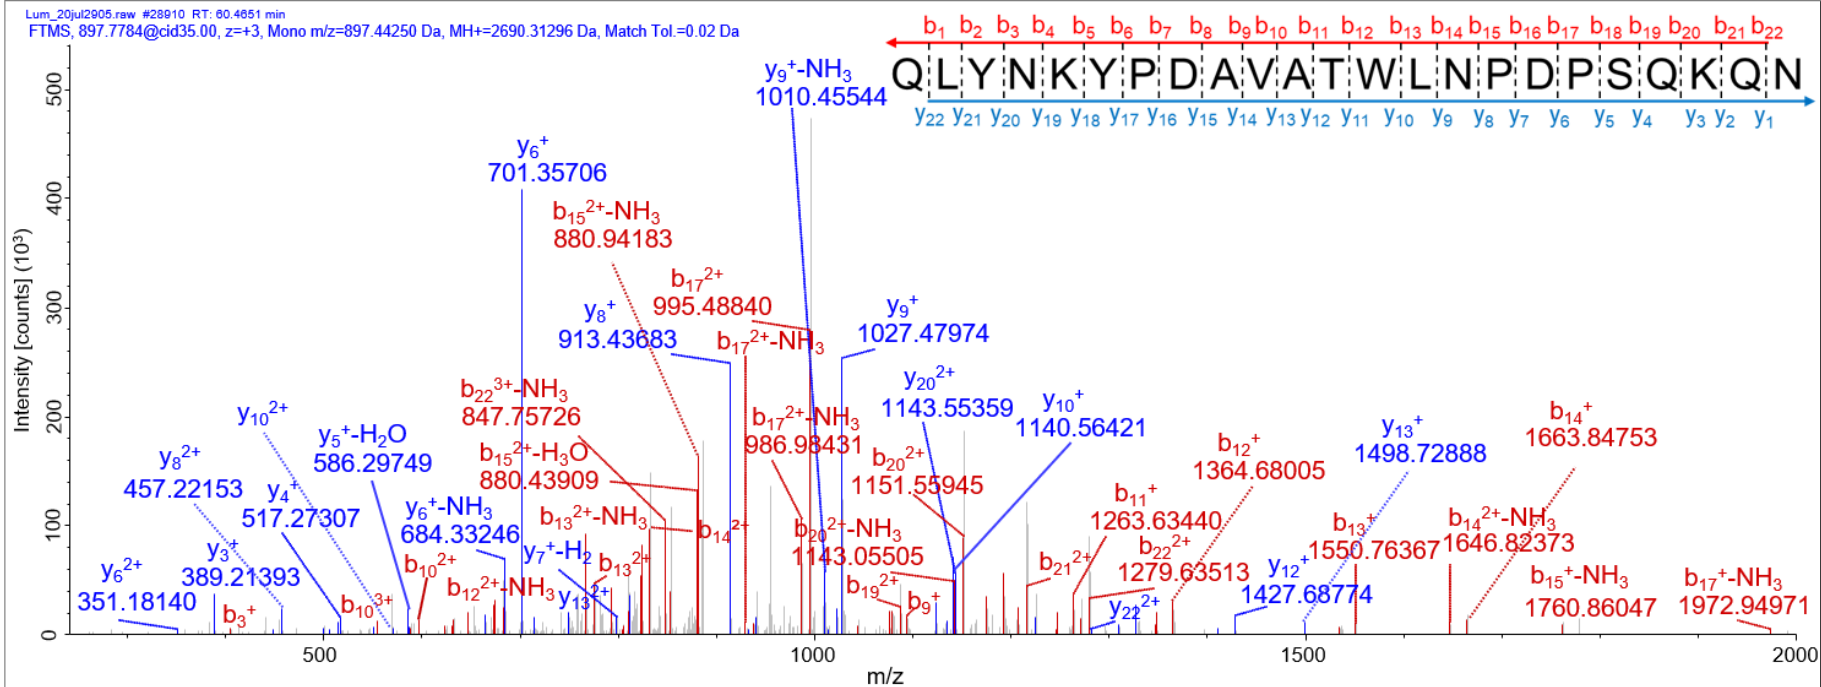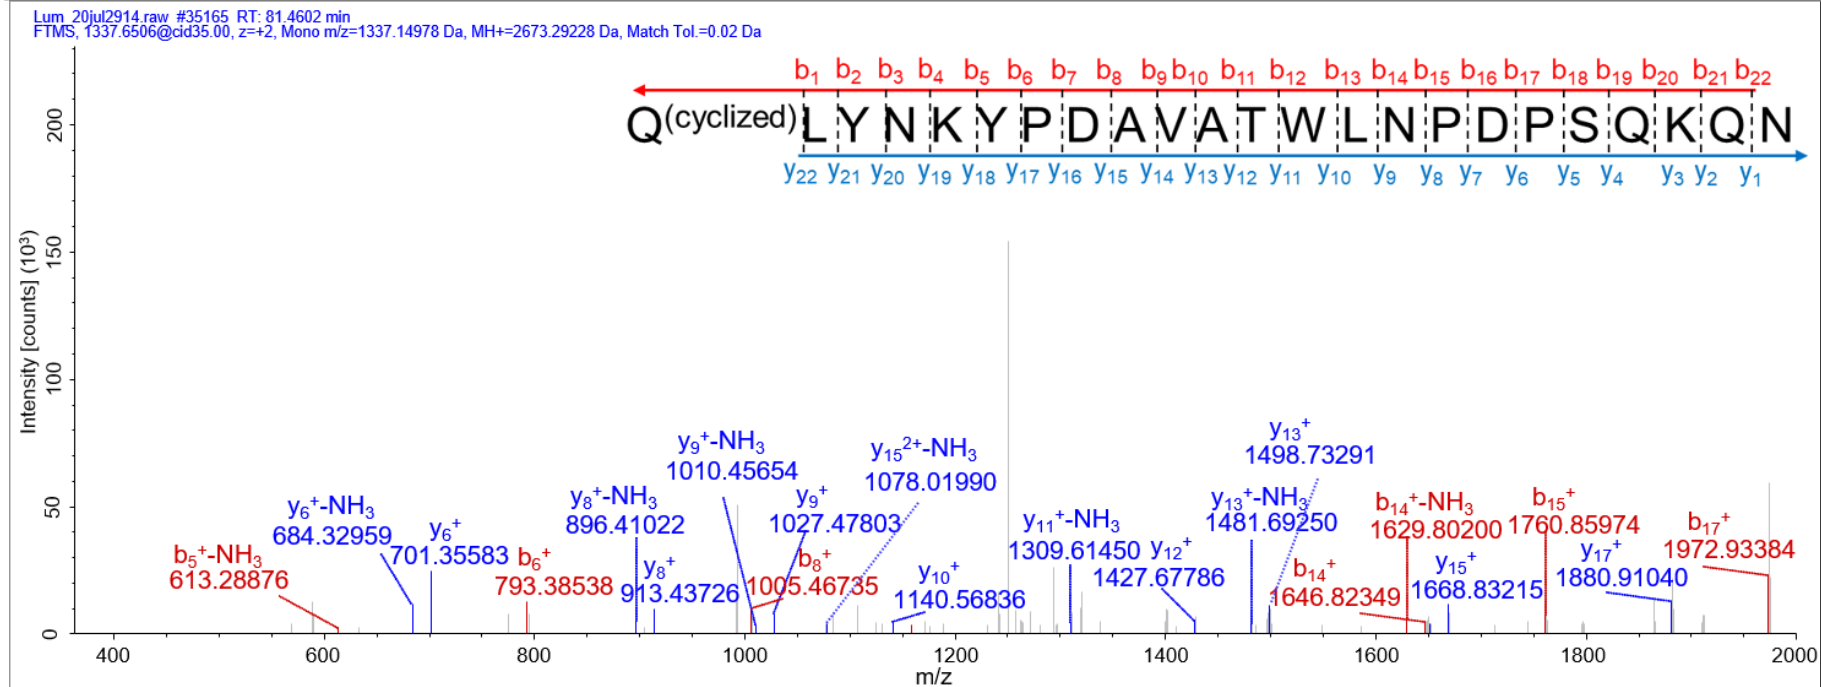

Fig. S4. Tryptic peptides detected in A) 2 h and B) 24 digestions of OPN with WT and EQ ADAMTS8. A z-score > 2 was considered significant.

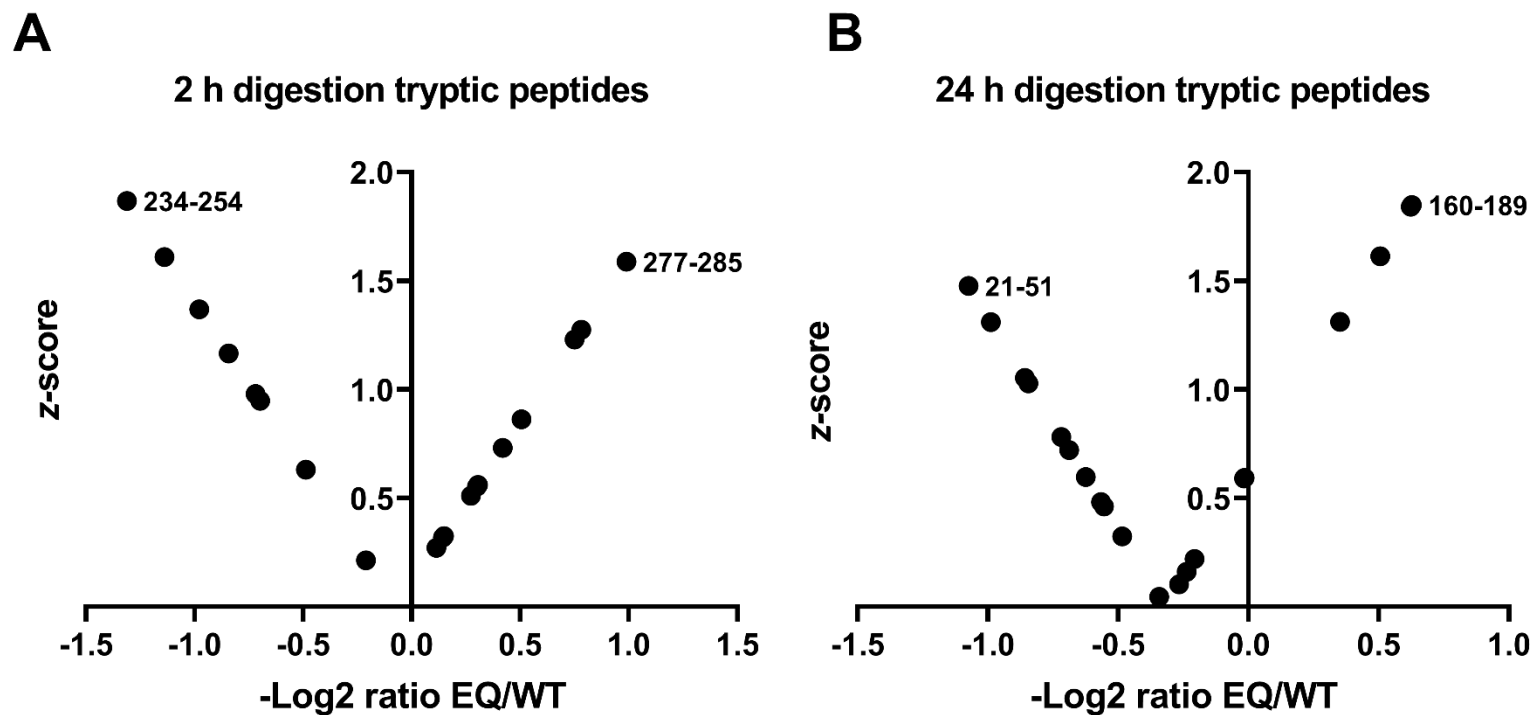

**Fig. S5. Annotated MS/MS spectra of ADAMTS8 derived peptides from the 24-hour OPN digestion.** Parent ions were selected for collision-induced dissociation fragmentation at 35% collisional energy. This fragmentation creates breakages at the amino-carboxyl bond to generate a series of b-ions (which retain the original N-terminus, in blue) and y-ions (which retain the original C-terminus, in red). The m/z of the b/y ions corresponds to known amino acid residues or amino acid ensembles, providing the parent ion amino acid sequence (labelled on each spectrum).

Lum\_20jul2908.raw #16430 RT: 37.9985 min  
 FTMS, 531.2761@cid35.00, z=+4, Mono m/z=531.02539 Da, MH+=2121.07973 Da, Match Tol.=0.02 Da

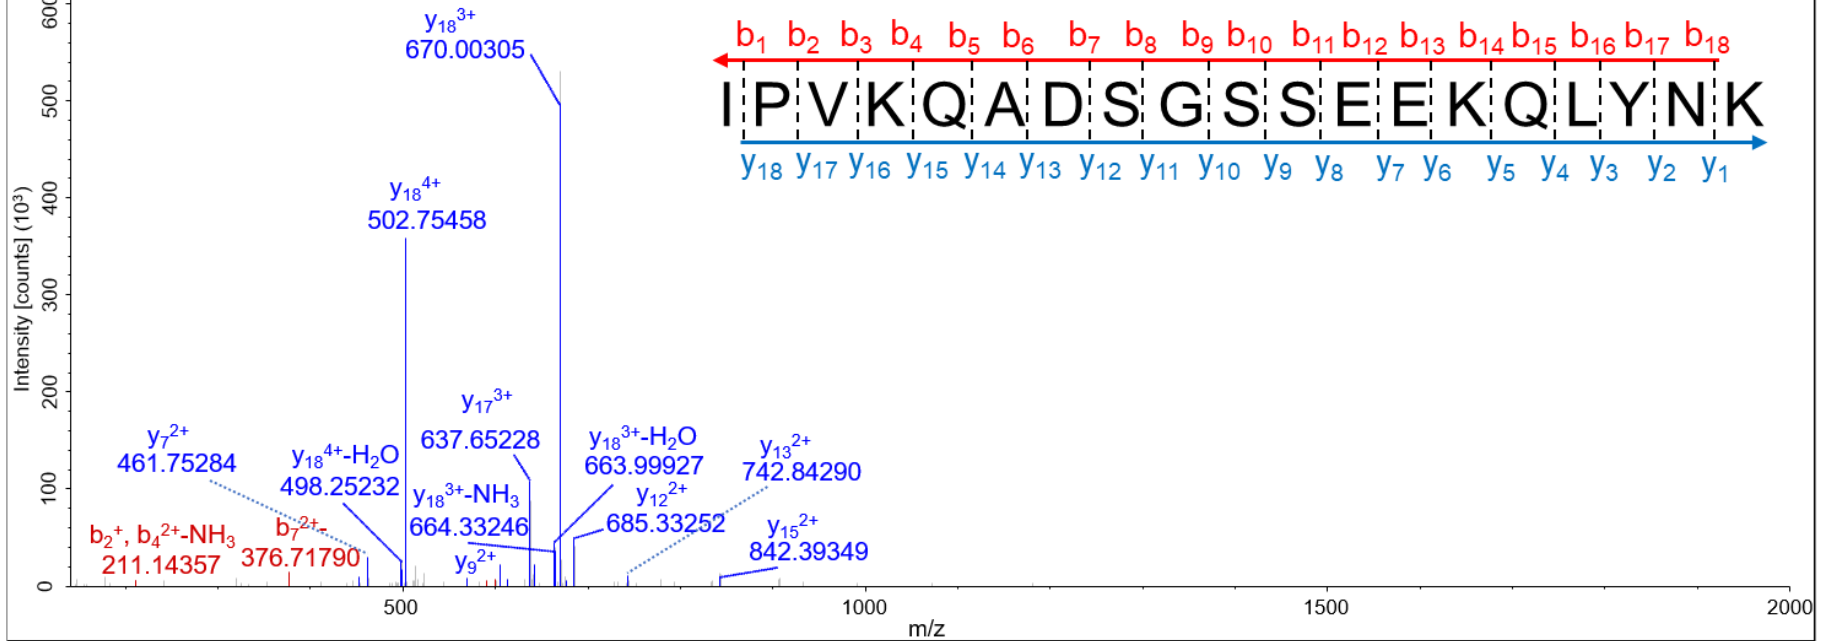

Lum\_20jul2907.raw #27037 RT: 61.0725 min  
 FTMS, 682.0082@cid35.00, z=+3, Mono m/z=682.00824 Da, MH+=2044.01017 Da, Match Tol.=0.02 Da

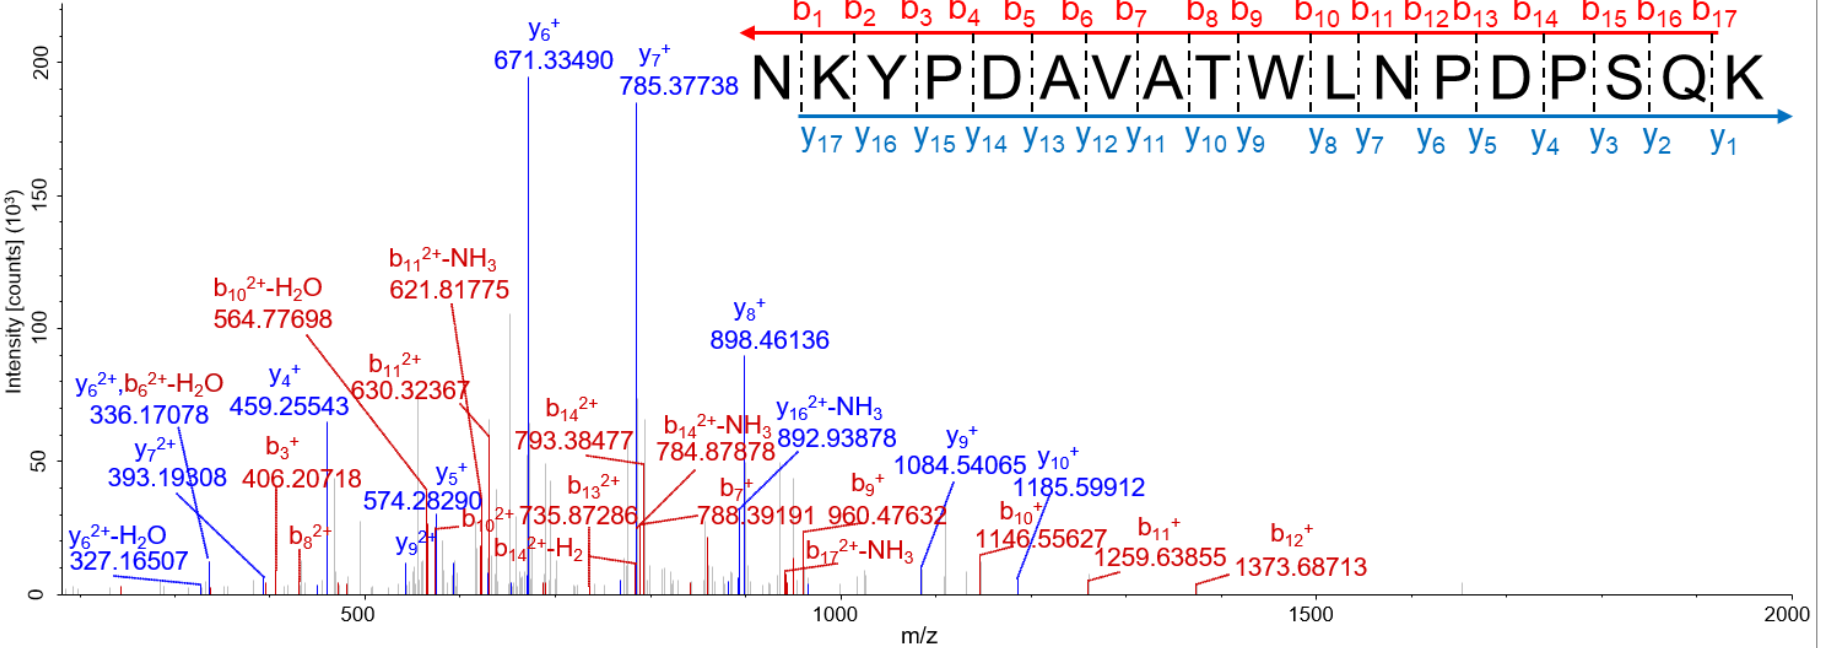

Lum\_20jul2917.raw #41619 RT: 87.7286 min  
 FTMS, 996.4802@cid35.00, z=+2, Mono m/z=995.97968 Da, MH+=1990.95207 Da, Match Tol.=0.02 Da

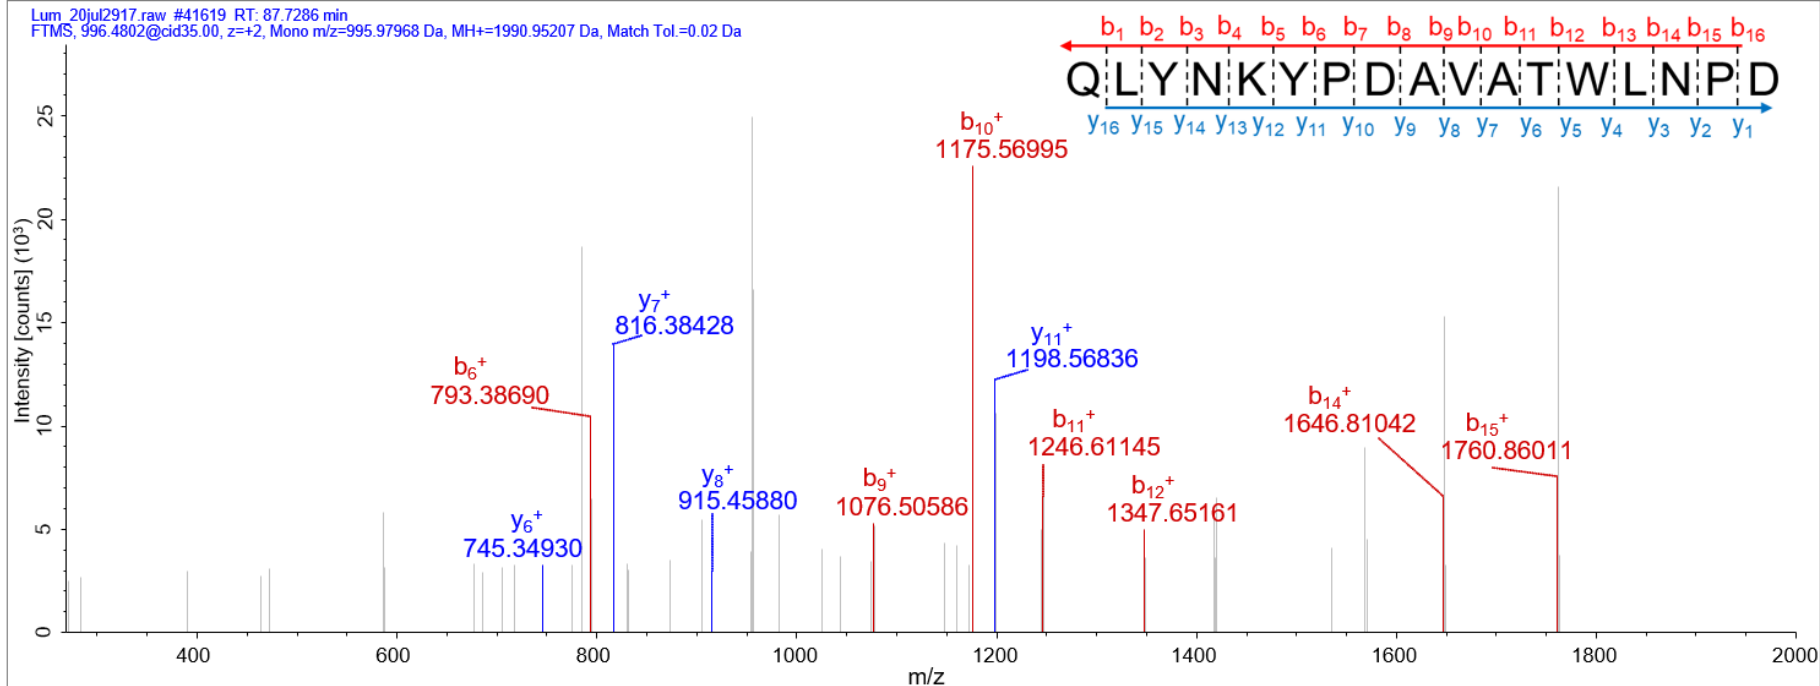

Lum\_20jul2907.raw #13817 RT: 33.9487 min  
 FTMS, 570.2571@cid35.00, z=+2, Mono m/z=570.25714 Da, MH+=1139.50701 Da, Match Tol.=0.02 Da

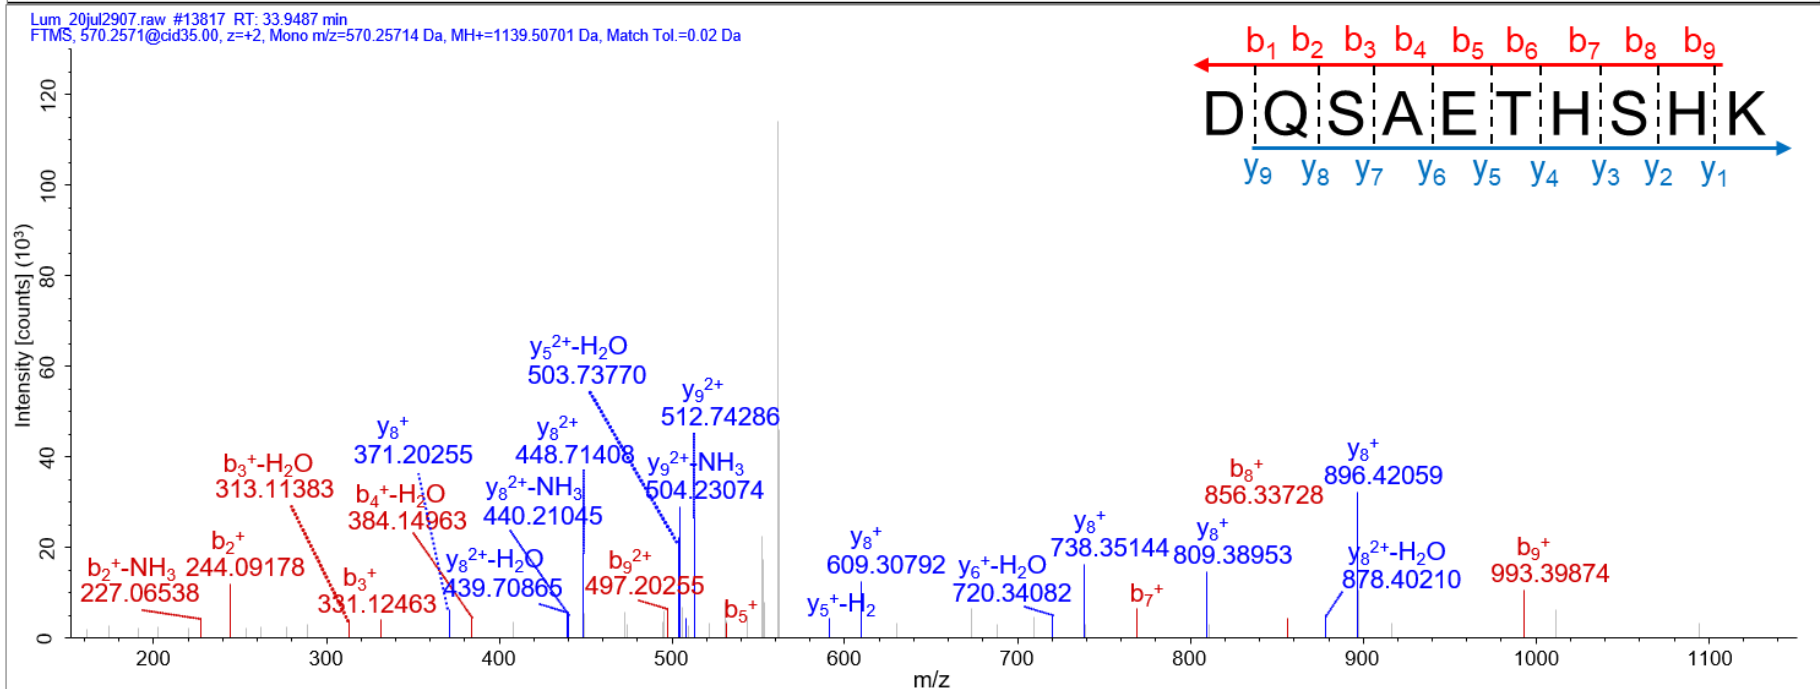

Lum\_20jul2907.raw #36210 RT: 78.0198 min  
 FTMS, 1337.6519@cid35.00, z=+2, Mono m/z=1337.15015 Da, MH+=2673.29302 Da, Match Tol.=0.02 Da

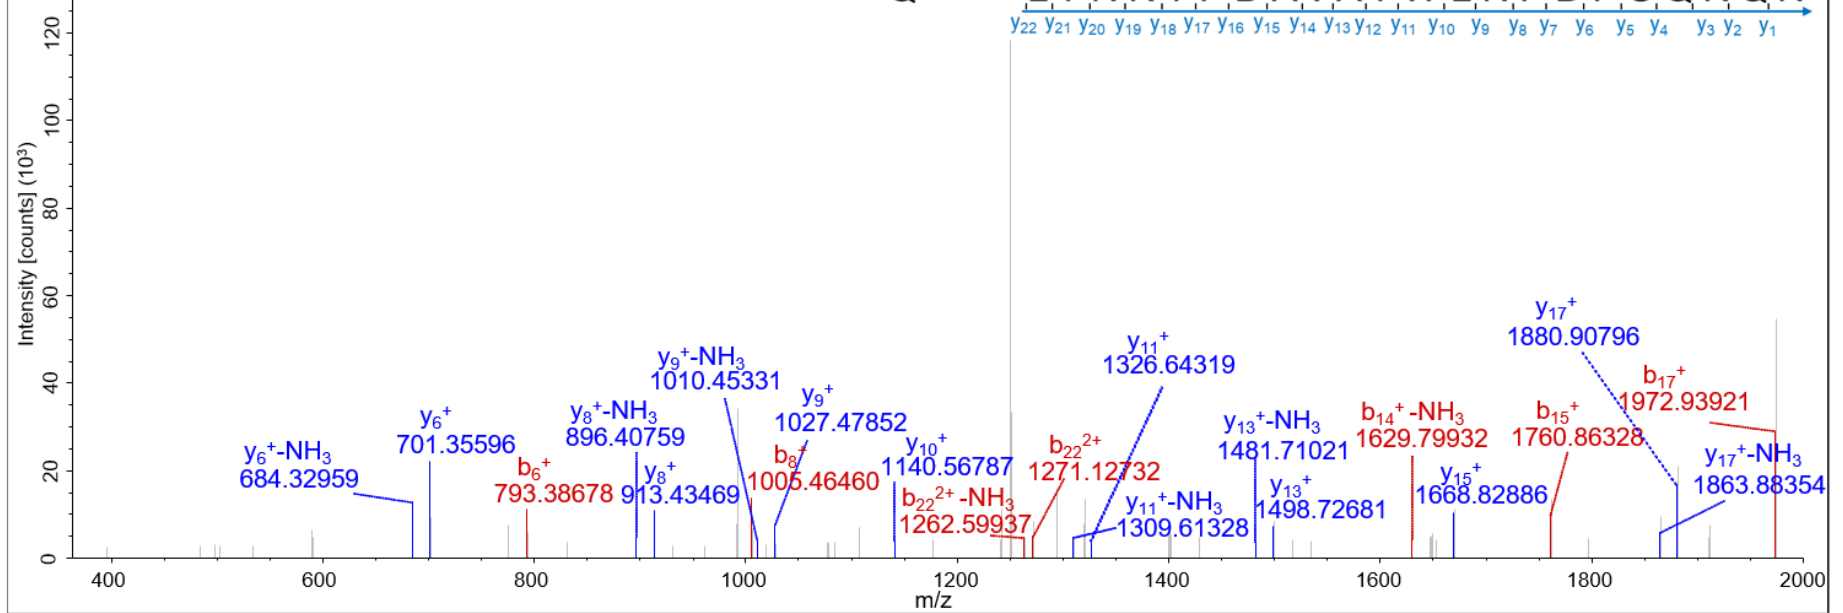

Lum\_20jul2907.raw #29771 RT: 66.3699 min  
 FTMS, 897.7780@cid35.00, z=+3, Mono m/z=897.44501 Da, MH+=2690.32047 Da, Match Tol.=0.02 Da

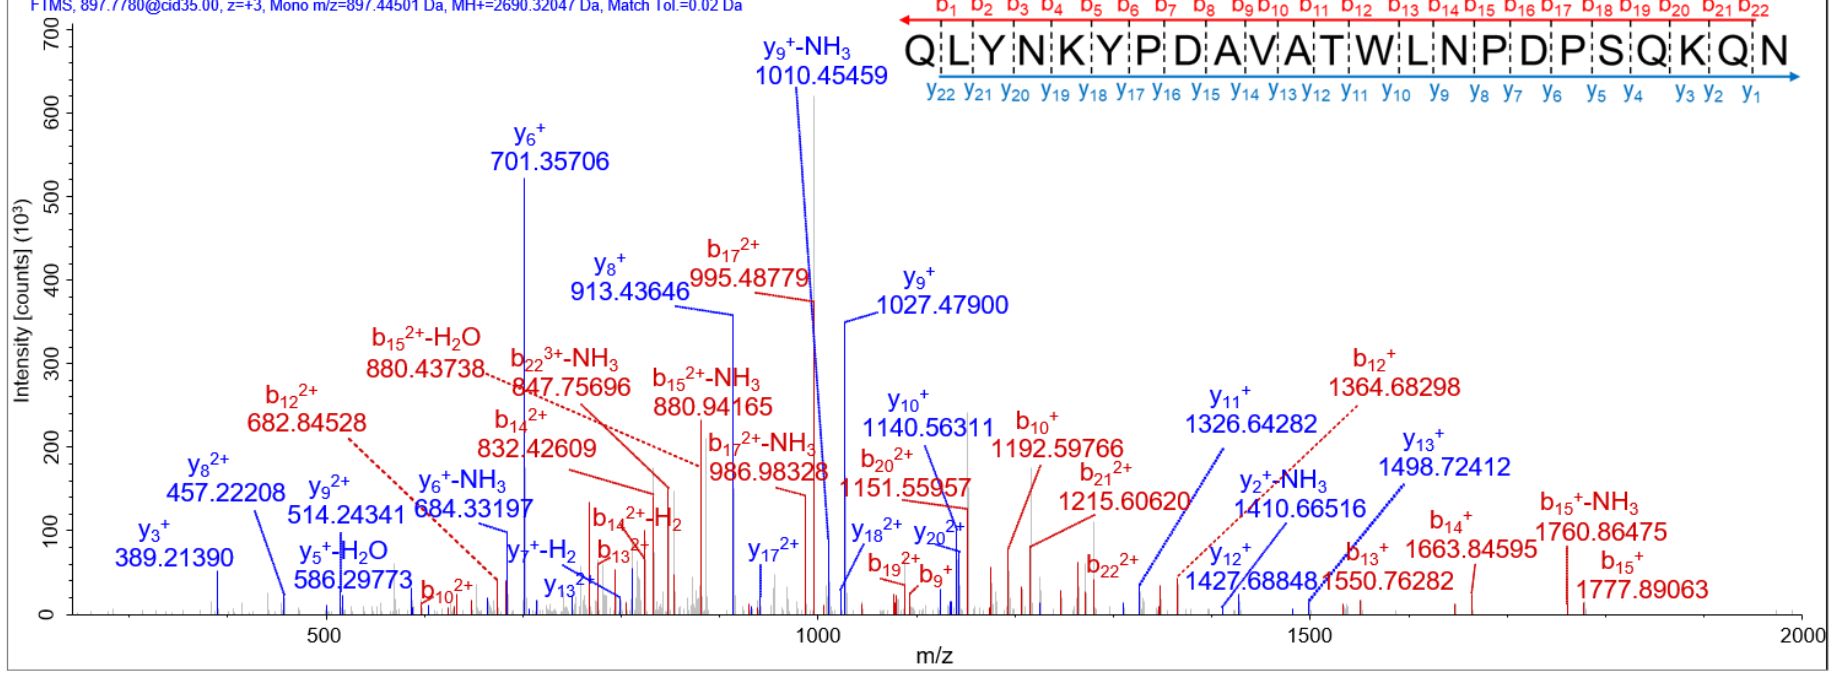

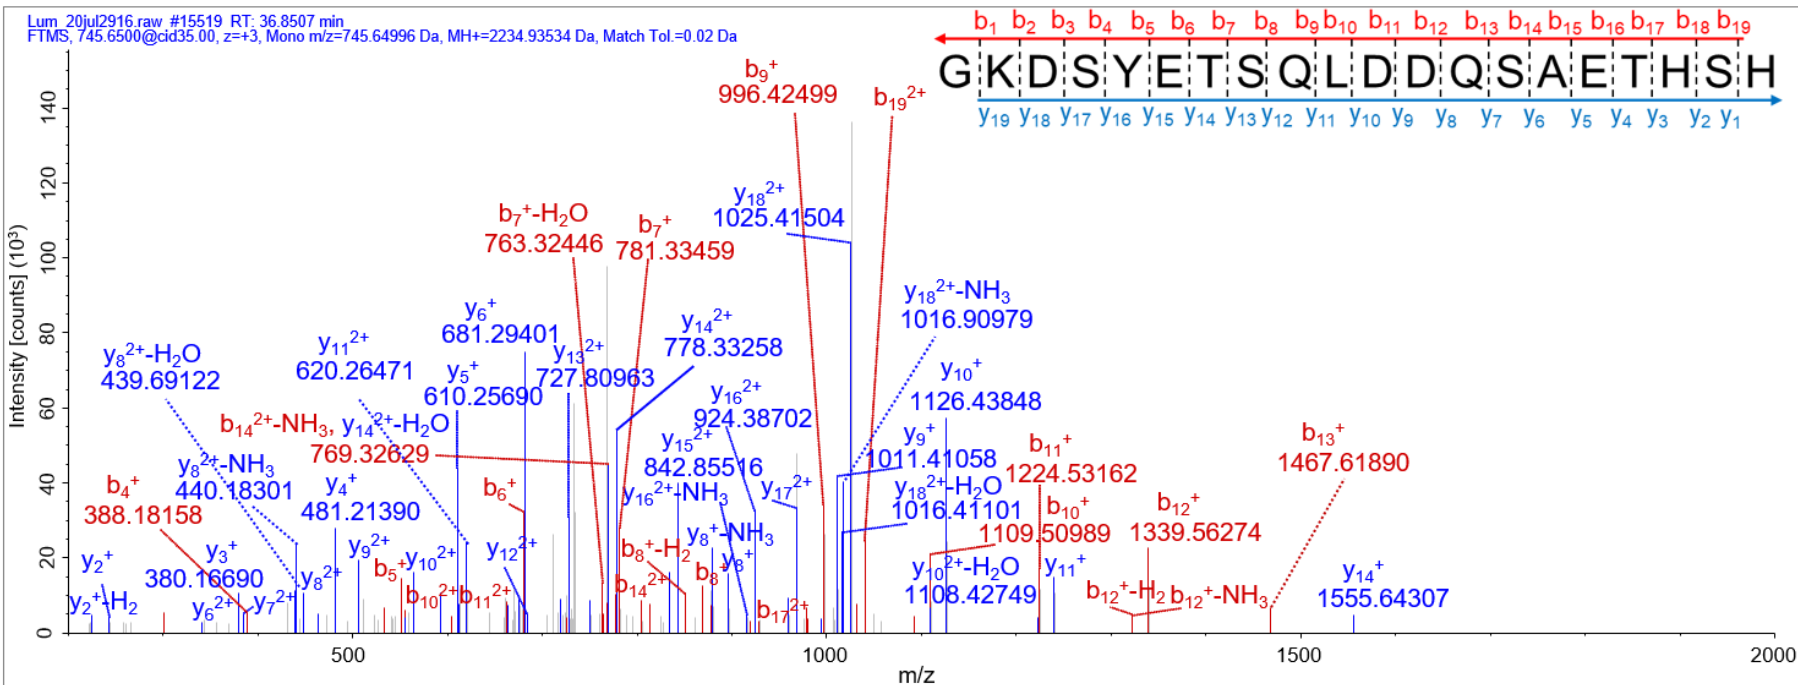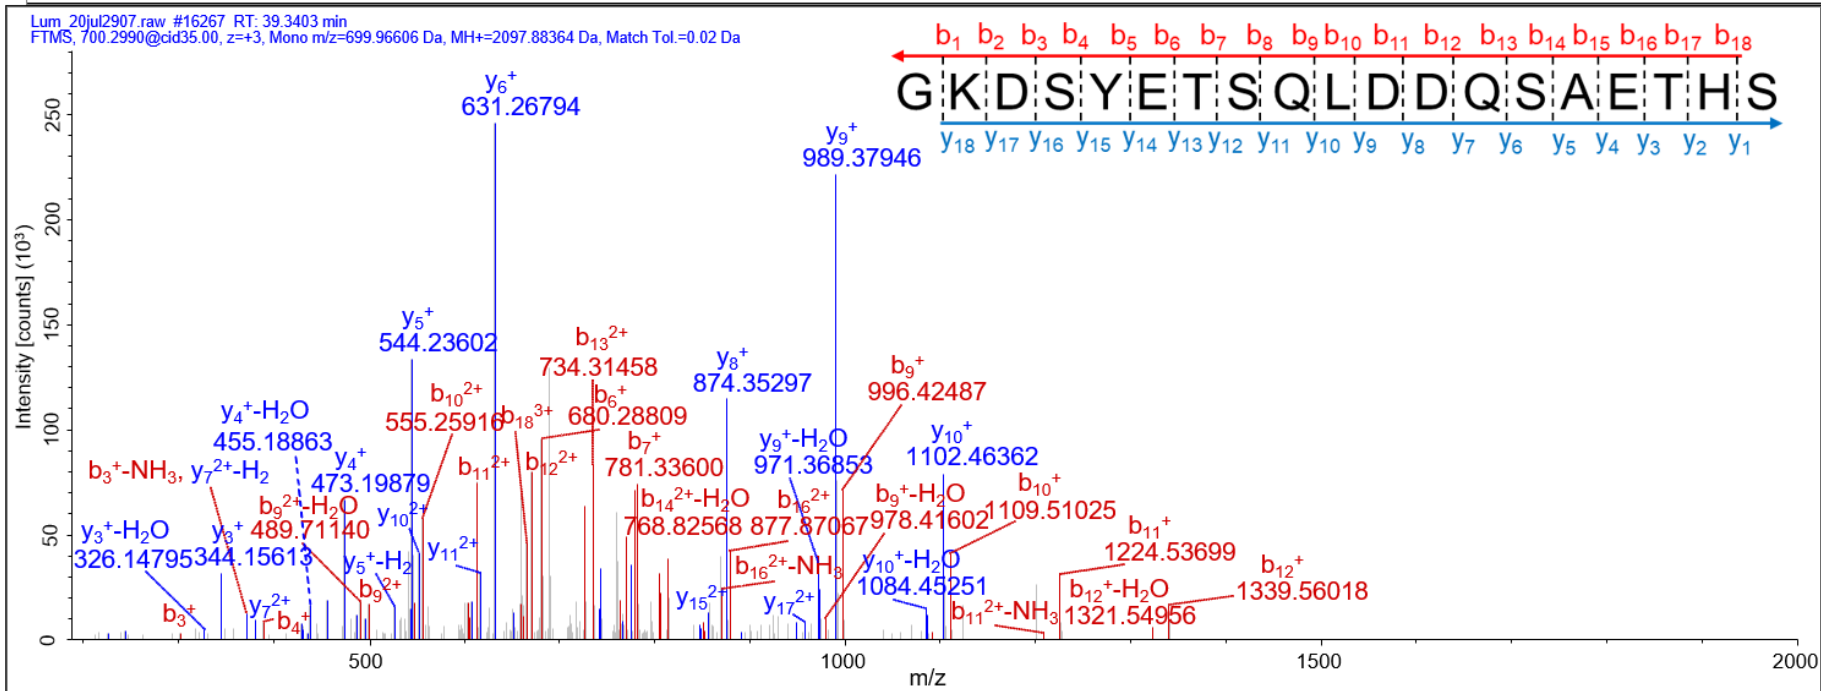

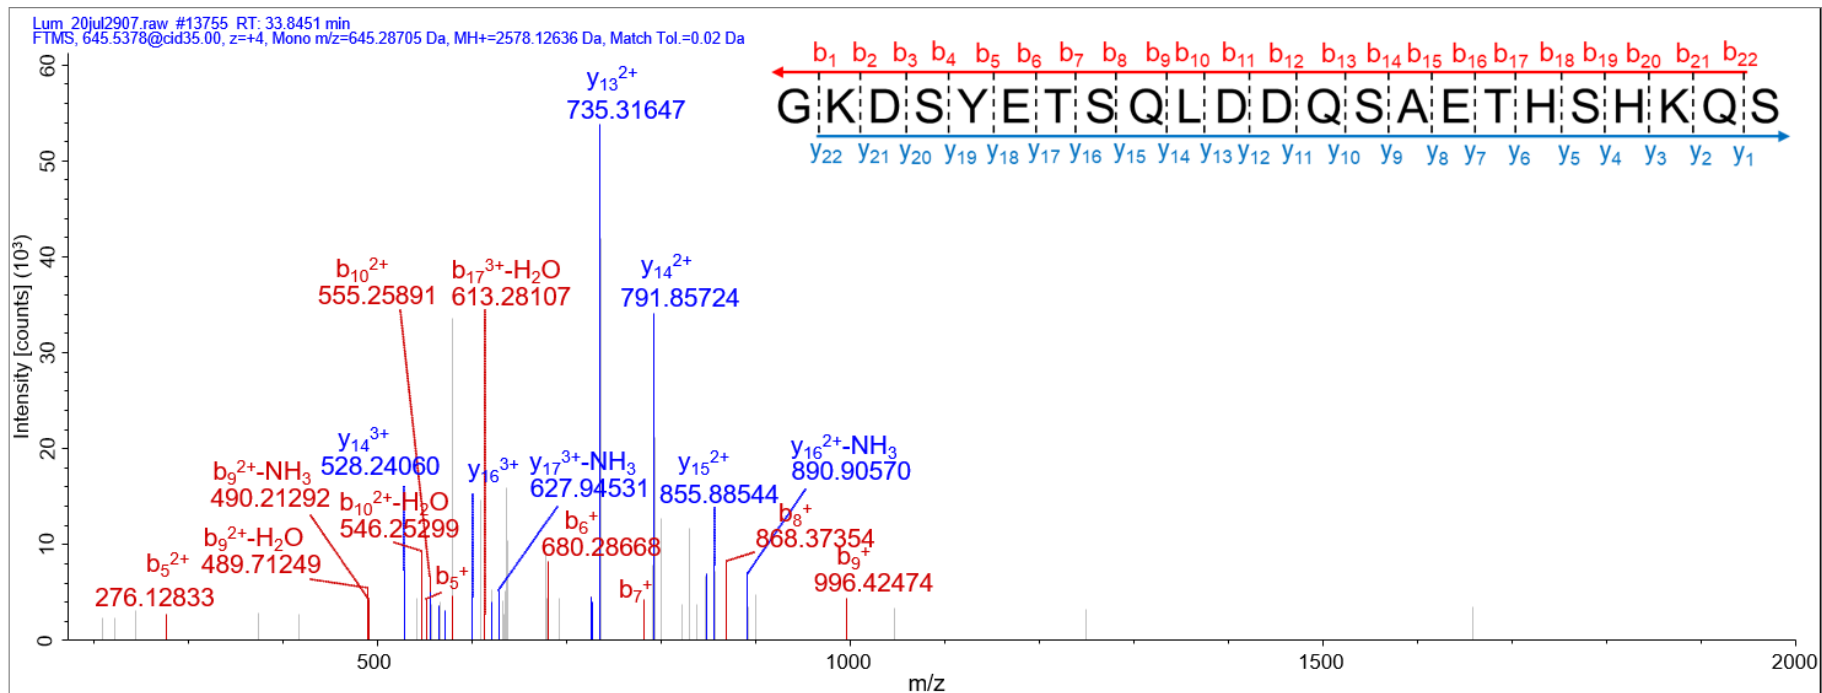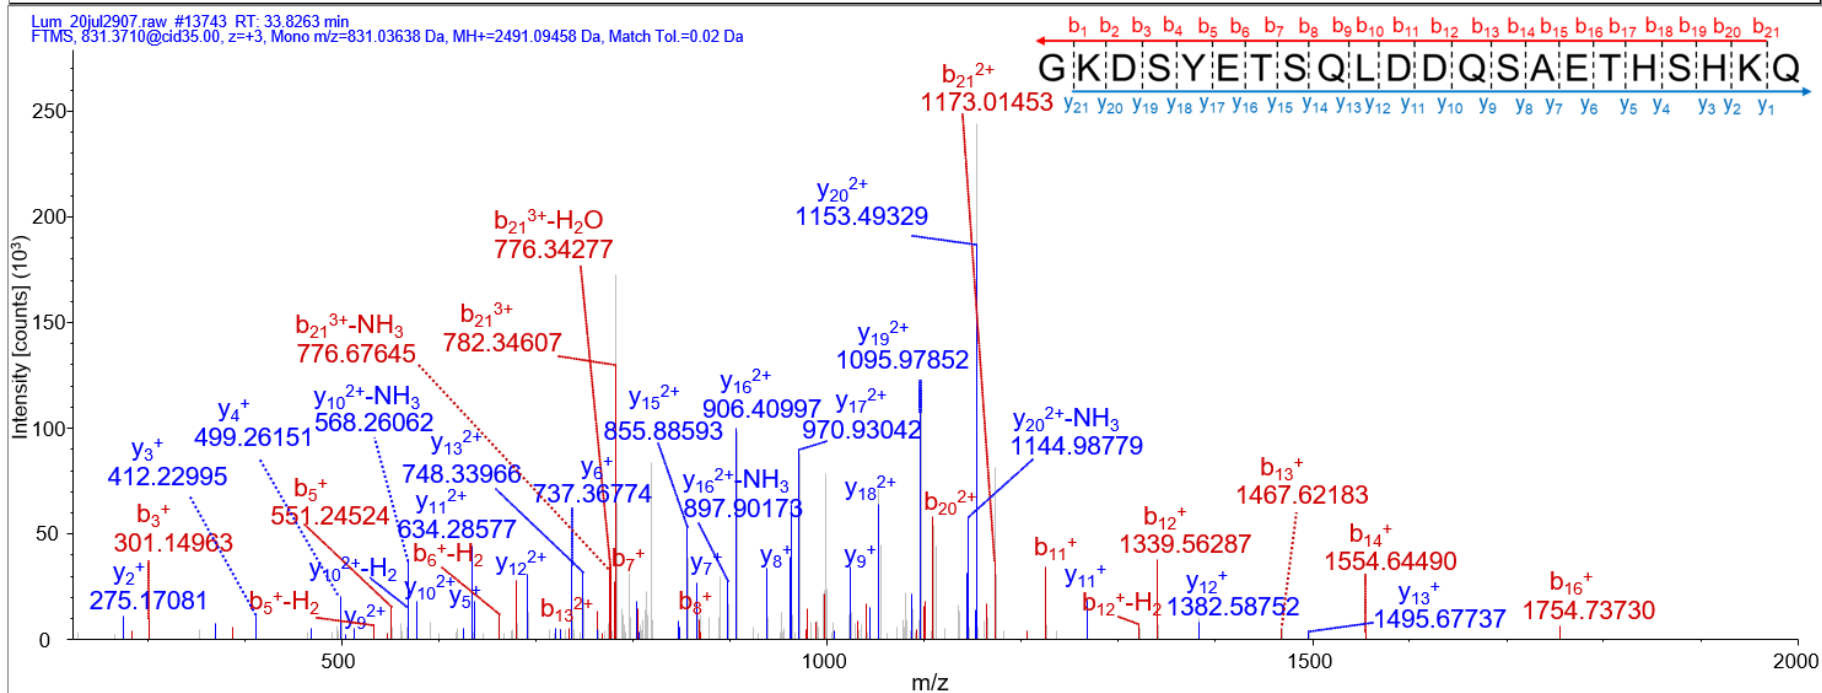



Lum\_20jul2907.raw #14703 RT: 35.4891 min  
FTMS, 474.8937@cid35.00, z=+3, Mono m/z=474.89368 Da, MH+=1422.66648 Da, Match Tol.=0.02 Da

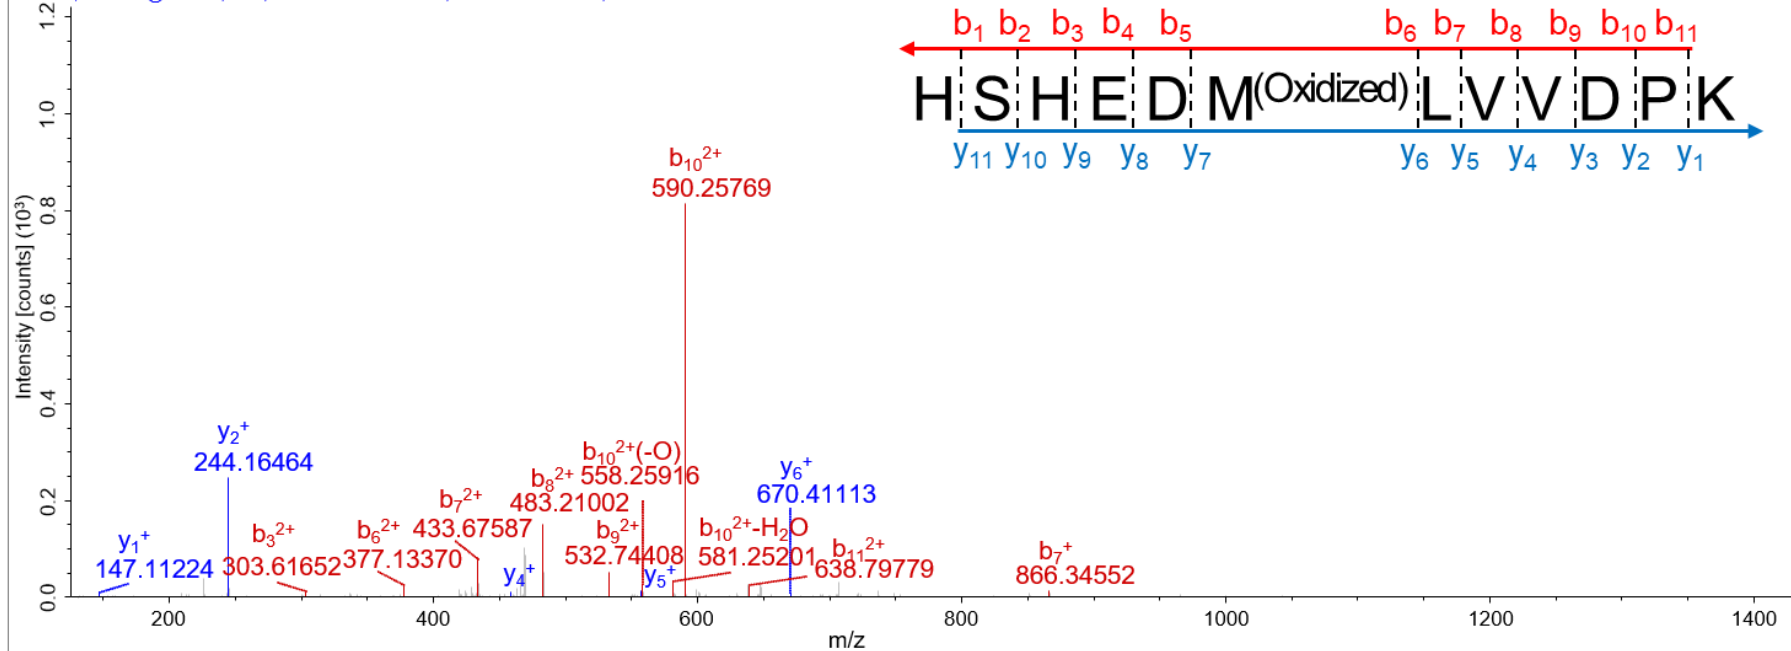

Lum\_20jul2916.raw #17113 RT: 40.8227 min  
FTMS, 469.5612@cid35.00, z=+3, Mono m/z=469.56125 Da, MH+=1406.66919 Da, Match Tol.=0.02 Da

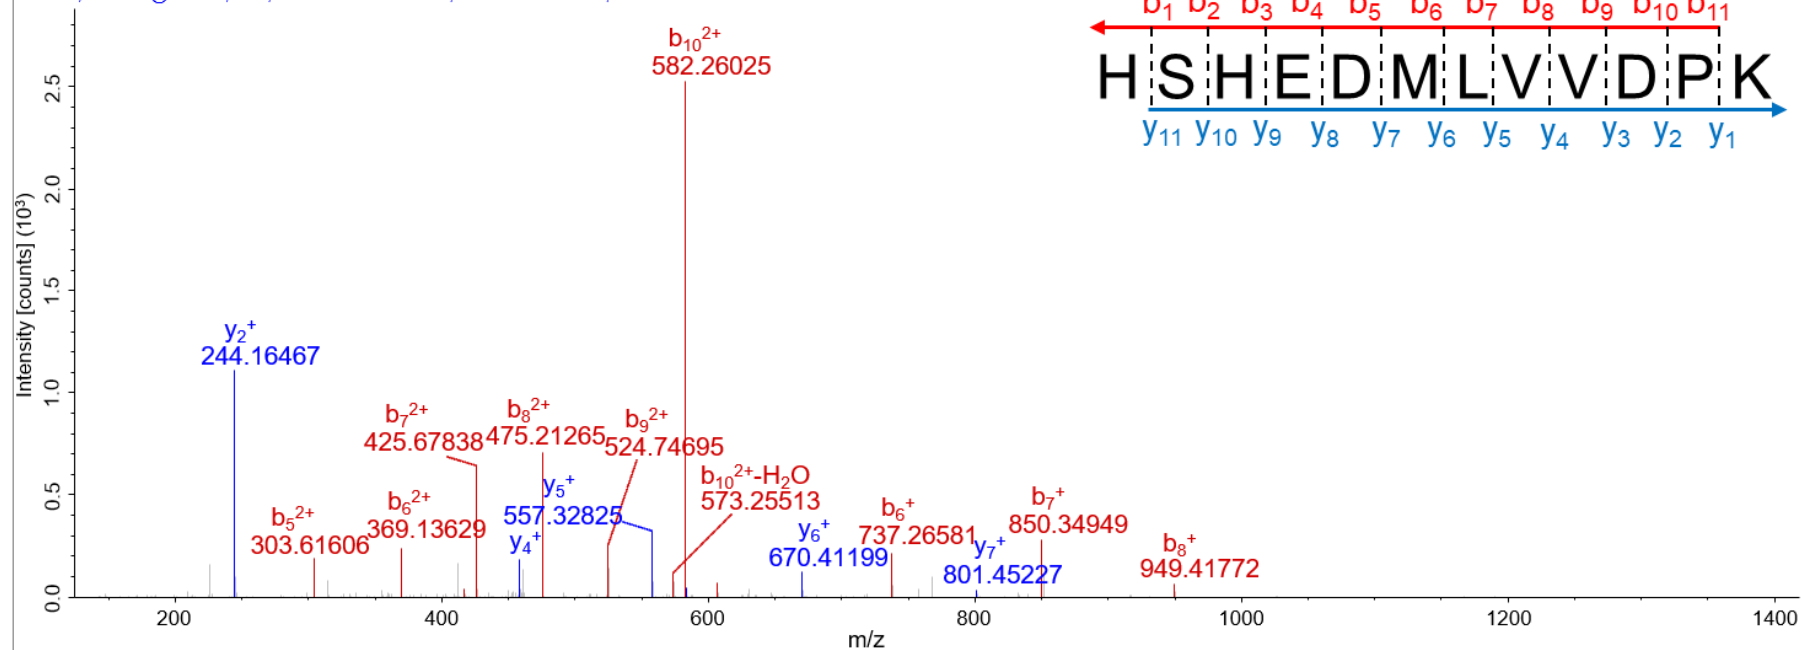

Lum\_20jul2916.raw #14526 RT: 34.4482 min  
 FTMS, 958.9066@cid35.00, z=+2, Mono m/z=958.90662 Da, MH+=1916.80596 Da, Match Tol.=0.02 Da

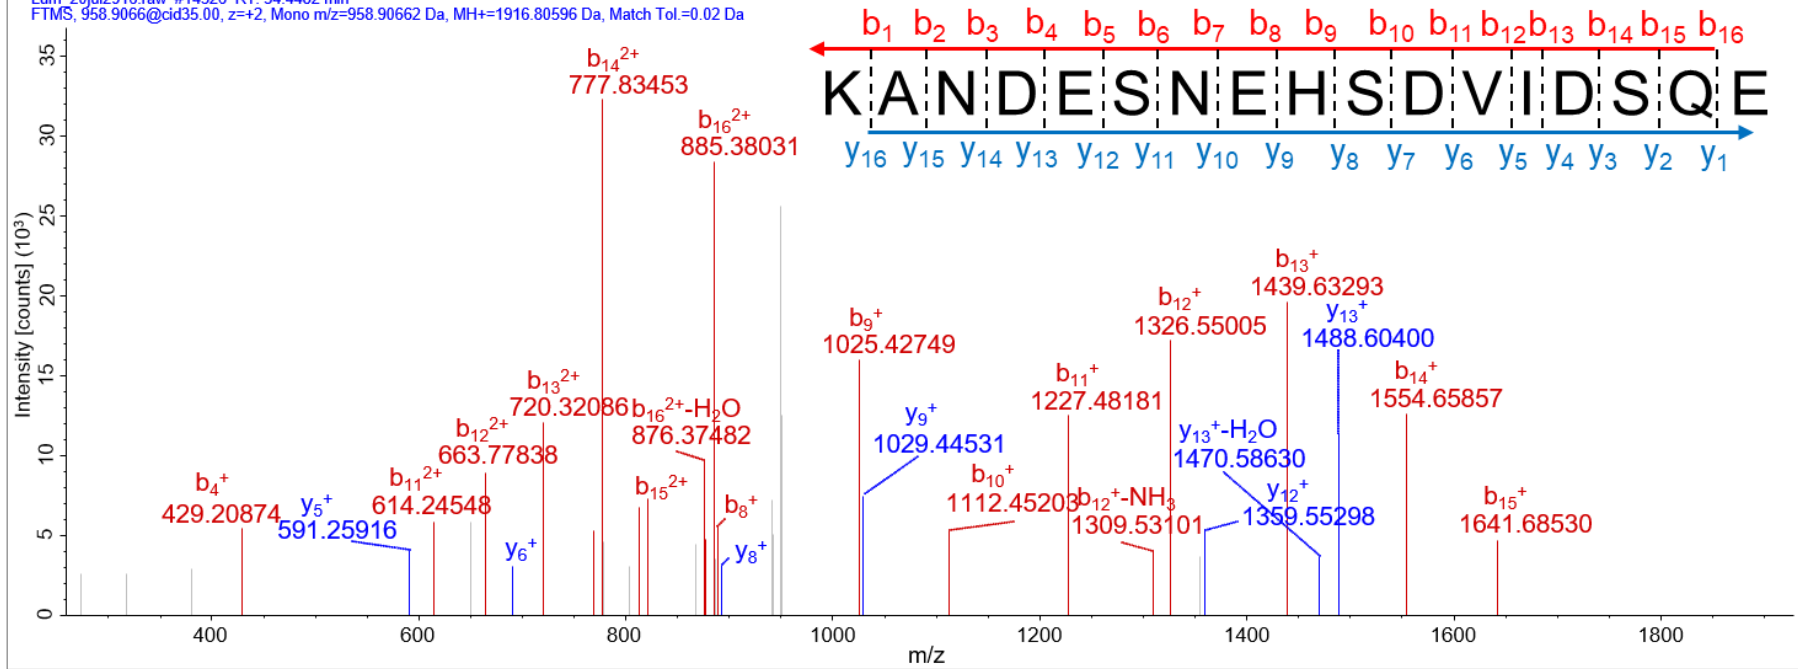

Lum\_20jul2907.raw #18106 RT: 43.5961 min  
 FTMS, 777.8741@cid35.00, z=+2, Mono m/z=777.37372 Da, MH+=1553.74016 Da, Match Tol.=0.02 Da

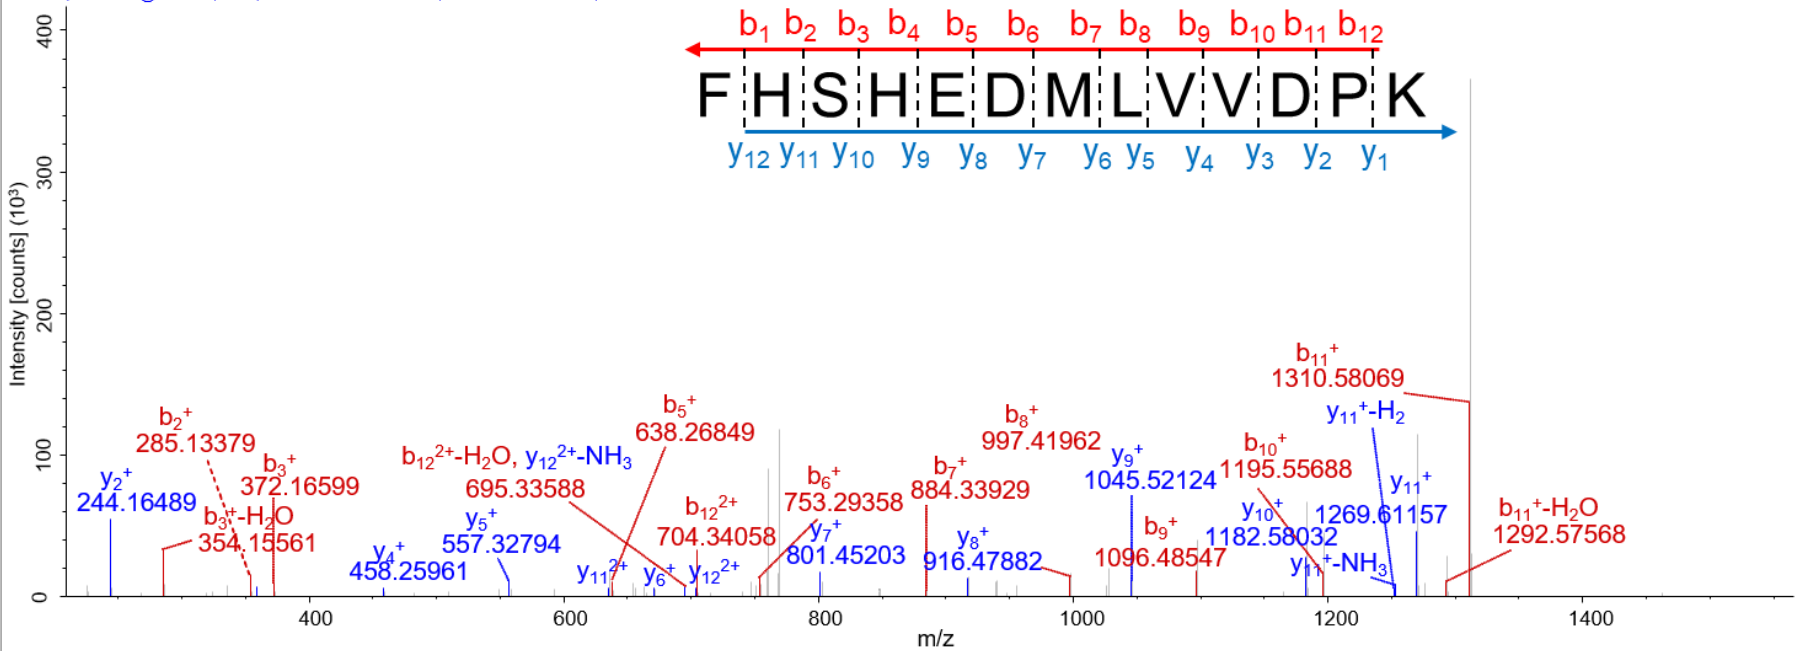

## List of Supporting Tables

**Table S1: Autolytic cleavage sites in ADAMTS8 identified by LC-MS/MS.** Reactions were performed for 24 h, at 37°C. Putative cleavage sites are between the residues in bold. Ratios in bold are scaled due to being only measurable in one digest.

| Annotated Sequence                                    | xCorr score | Peptide position | P1   | P1'  | WT/EQ ratio | z-score |
|-------------------------------------------------------|-------------|------------------|------|------|-------------|---------|
| [R].LQSFRPLPEPLTV <b>Q</b> . <b>[L]</b>               | 3.14        | 776-789          | Q789 | L790 | <b>100</b>  | 6.7     |
| [R].LQSFRPLPEPLTV <b>Q</b> L. <b>[L]</b>              | 3.15        | 776-790          | L790 | L791 | <b>100</b>  | 6.7     |
| [R].SHPGVQNDGNYLA. <b>[L]</b>                         | 3.00        | 722-734          | A734 | L735 | <b>100</b>  | 6.7     |
| [K].YTFFVPNDVDFSM. <b>[Q]</b>                         | 2.17        | 804-816          | M816 | Q817 | <b>100</b>  | 6.7     |
| [K].YTFFVPNDVDFSM <b>Q</b> S. <b>[S]</b>              | 2.54        | 804-818          | S818 | S819 | <b>100</b>  | 6.7     |
| [A].LKTADGQYLLNGNL A <b>I</b> SAIEQDILVK. <b>[G.]</b> | 4.87        | 735-760          | A734 | L735 | <b>100</b>  | 6.7     |
| [Y].LLNGNL <b>A</b> ISAIEQDILVK. <b>[G]</b>           | 3.94        | 743-760          | Y742 | L743 | <b>100</b>  | 6.7     |

**Table S2: List of differentially regulated genes encoding secreted/ECM proteins in pulmonary artery hypertension (PAH).** Only ECM/secreted protein-encoding genes with changes in expression compared with non-PAH controls  $\geq 1$  are reported. GEO, Gene Expression Omnibus; PAECs, Pulmonary artery endothelial cells; SMCs, smooth muscle cells.

| Reference (GEO ID) | RNA source              | Platform   | NCBI gene name  | Up/down-Regulated (Fold) |
|--------------------|-------------------------|------------|-----------------|--------------------------|
| 65                 | Lungs from PAH patients | Affymetrix | <i>ANGP1</i>    | Down                     |
|                    |                         |            | <i>GAS6</i>     | Down                     |
|                    |                         |            | <i>THBD</i>     | Down                     |
| 66                 | Lungs from PAH patients | Agilent    | <i>AGRP</i>     | Up (1.1)                 |
|                    |                         |            | <i>C1QA</i>     | Up (1.0)                 |
|                    |                         |            | <i>COLQ</i>     | Down (1.4)               |
|                    |                         |            | <i>FRZB</i>     | Down (1.6)               |
|                    |                         |            | <i>GREM1</i>    | Down (1.6)               |
|                    |                         |            | <i>IL16</i>     | Down (1.9)               |
|                    |                         |            | <i>LCAT</i>     | Down (1.2)               |
|                    |                         |            | <i>MATN2</i>    | Down (1.6)               |
|                    |                         |            | <i>MMP15</i>    | Up (1.3)                 |
|                    |                         |            | <i>NRTN</i>     | Up (2.3)                 |
|                    |                         |            | <i>NTN3</i>     | Up (1.2)                 |
|                    |                         |            | <i>PLA2G12B</i> | Up (1.5)                 |
|                    |                         |            | <i>PRSS8</i>    | Up (1.2)                 |
|                    |                         |            | <i>SERPINA5</i> | Down (1.4)               |
|                    |                         |            | <i>TGFB3</i>    | Down (1.2)               |
| <i>TNC</i>         | Down (1)                |            |                 |                          |
| 67                 | Lungs from PAH patients | Agilent    | <i>VEGFA</i>    | Up (1.4)                 |
|                    |                         |            | <i>COL1A2</i>   | Up (1.0)                 |
|                    |                         |            | <i>COL3A1</i>   | Up (1.1)                 |
|                    |                         |            | <i>COL4A1</i>   | Up (1.0)                 |
|                    |                         |            | <i>COL6A3</i>   | Up (1.1)                 |
|                    |                         |            | <i>IGFBP4</i>   | Up (1.0)                 |
|                    |                         |            | <i>MGP</i>      | Up (1.1)                 |
|                    |                         |            | <i>SPARC</i>    | Up (1.1)                 |
|                    |                         |            | <i>SPOCK2</i>   | Up (1.0)                 |
|                    |                         |            | <i>TGFB1</i>    | Up (1.0)                 |
|                    |                         |            | <i>THBS1</i>    | Up (1.0)                 |
|                    |                         |            | <i>TNFAIP3</i>  | Up (2.1)                 |
|                    |                         |            | <i>VIM</i>      | Up (1.2)                 |
|                    |                         |            | <i>VWF</i>      | Up (1.1)                 |
|                    |                         |            | 68 (GSE24988)   | Lungs from PAH patients  |
| <i>MMP1</i>        | Up                      |            |                 |                          |
| <i>MMP7</i>        | Up                      |            |                 |                          |
| <i>MMP13</i>       | Up                      |            |                 |                          |
| <i>SPPI</i>        | <b>Up</b>               |            |                 |                          |
| 69 (GSE53408)      | Lungs from PAH patients | Affymetrix | <i>POSTN</i>    | Up (1.5)                 |
| 70                 | PAH PAECs               | Illumina   | <i>COL4A1</i>   | Down (1.7)               |
|                    |                         |            | <i>COL4A2</i>   | Down (1.4)               |
|                    |                         |            | <i>LOX</i>      | Down (1.1)               |
|                    |                         |            | <i>TIMP1</i>    | Down (1.1)               |

**Table S2 (continued)**

| Reference<br>(GEO ID) | RNA source & comparison | Platform   | NCBI<br>gene name  | Up/down-<br>Regulated<br>(Fold) |            |               |            |
|-----------------------|-------------------------|------------|--------------------|---------------------------------|------------|---------------|------------|
| 71                    | SMCs from PAH patients  | Affymetrix | <i>ADAMTS5</i>     | Down (2.6)                      |            |               |            |
|                       |                         |            | <i>BMP4</i>        | Up (3.3)                        |            |               |            |
|                       |                         |            | <i>CST1</i>        | Down (7.0)                      |            |               |            |
|                       |                         |            | <i>CTSH</i>        | Up (2.3)                        |            |               |            |
|                       |                         |            | <i>EREG</i>        | Down (6.3)                      |            |               |            |
|                       |                         |            | <i>GDF15</i>       | Down (1.9)                      |            |               |            |
|                       |                         |            | <i>MXRA5</i>       | Down (7.2)                      |            |               |            |
|                       |                         |            | <i>NID2</i>        | Down (2.5)                      |            |               |            |
|                       |                         |            | <i>SMOC1</i>       | Up (3.3)                        |            |               |            |
|                       |                         |            | <i>SOD3</i>        | Down (1.6)                      |            |               |            |
|                       |                         |            | <i>VEGFA</i>       | Down (1.7)                      |            |               |            |
| 33                    | Senescent PAH-SMC       | Affymetrix | <i>ADAMTS8</i>     | Down                            |            |               |            |
|                       |                         |            | <i>CLEC3B</i>      | Down                            |            |               |            |
|                       |                         |            | <i>COL14A1</i>     | Down                            |            |               |            |
|                       |                         |            | <i>COL15A1</i>     | Down                            |            |               |            |
|                       |                         |            | <i>KAL1</i>        | Down                            |            |               |            |
|                       |                         |            | <i>MMP11</i>       | Down                            |            |               |            |
|                       |                         |            | <i>MMP16</i>       | Down                            |            |               |            |
|                       |                         |            | <i>NCAM1</i>       | Up (4)*                         |            |               |            |
|                       |                         |            | <b><i>SPP1</i></b> | <b>Up (14)*</b>                 |            |               |            |
|                       |                         |            | <i>TNC</i>         | Up (9)*                         |            |               |            |
|                       |                         |            | <i>TGFB1</i>       | Up (10)*                        |            |               |            |
| <i>VCAM1</i>          | Down                    |            |                    |                                 |            |               |            |
| <i>VTN</i>            | Down                    |            |                    |                                 |            |               |            |
| 72                    | PAH fibroblasts         | Affymetrix | <i>Adam23</i>      | Down (2.5)                      |            |               |            |
|                       |                         |            | <i>ADAMTS19</i>    | Down (2.3)                      |            |               |            |
|                       |                         |            | <i>BGN</i>         | Up (2.4)                        |            |               |            |
|                       |                         |            | <i>BMP6</i>        | Down (2.2)                      |            |               |            |
|                       |                         |            | <i>EPGN</i>        | Down (2.7)                      |            |               |            |
|                       |                         |            | <i>RELN</i>        | Down (4.8)                      |            |               |            |
|                       |                         |            | <i>SERPINE2</i>    | Down (3.6)                      |            |               |            |
|                       |                         |            | <i>SERPINI1</i>    | Down (2.5)                      |            |               |            |
|                       |                         |            | <i>SPON2</i>       | Up (2.2)                        |            |               |            |
|                       |                         |            | <i>TNC</i>         | Up (3.3)                        |            |               |            |
|                       |                         |            | <i>VCAN</i>        | Down (2.8)                      |            |               |            |
|                       |                         |            | 73<br>(GSE85618)   | Lungs from rats (hypoxia model) | Affymetrix | <i>CXCL5</i>  | Down (1.9) |
|                       |                         |            |                    |                                 |            | <i>CLEC4D</i> | Up (2.7)   |
| <i>CSF3R</i>          | Up (2.4)                |            |                    |                                 |            |               |            |
| <i>GREM1</i>          | Down (2.2)              |            |                    |                                 |            |               |            |
| <i>MMP8</i>           | Up (3.9)                |            |                    |                                 |            |               |            |
| <i>RETNLG</i>         | Up (3.3)                |            |                    |                                 |            |               |            |
| <i>S100A8</i>         | Up (3.4)                |            |                    |                                 |            |               |            |
| <i>S100a9</i>         | Up (3.1)                |            |                    |                                 |            |               |            |
| <i>THBS2</i>          | Down (2.0)              |            |                    |                                 |            |               |            |

\*estimated from Figure 1

**Table S2 (continued)**

| Reference<br>(GEO ID) | RNA source & comparison         | Platform   | NCBI<br>gene name  | Up/down-<br>Regulated<br>(Fold) |
|-----------------------|---------------------------------|------------|--------------------|---------------------------------|
| 74<br>(GSE117261)     | Lungs from PAH patients         | Affymetrix | <i>ADAMTS17</i>    | Up (1.1)                        |
|                       |                                 |            | <i>ADAMTS1L</i>    | Up (1.4)                        |
|                       |                                 |            | <i>ASPN</i>        | Up (3.3)                        |
|                       |                                 |            | <i>BMP6</i>        | Up (2.1)                        |
|                       |                                 |            | <i>CFD</i>         | Up (1.7)                        |
|                       |                                 |            | <i>COL14A1</i>     | Up (2.4)                        |
|                       |                                 |            | <i>COL18A1</i>     | Up (1.2)                        |
|                       |                                 |            | <i>COL4A3</i>      | Up (1.4)                        |
|                       |                                 |            | <i>COL6A6</i>      | Up (2.1)                        |
|                       |                                 |            | <i>CXCL12</i>      | Up (2.0)                        |
|                       |                                 |            | <i>ECM2</i>        | Up (1.9)                        |
|                       |                                 |            | <i>EFEMP2</i>      | Up (1.4)                        |
|                       |                                 |            | <i>IGFBP7</i>      | Up (1.4)                        |
|                       |                                 |            | <i>LTBP1</i>       | Up (2.0)                        |
|                       |                                 |            | <i>LTBP2</i>       | Up (1.9)                        |
|                       |                                 |            | <i>LTBP3</i>       | Up (1.4)                        |
|                       |                                 |            | <i>LTBP4</i>       | Up (1.5)                        |
|                       |                                 |            | <i>LUM</i>         | Up (1.6)                        |
|                       |                                 |            | <i>MASP1</i>       | Up (1.1)                        |
|                       |                                 |            | <i>MATN2</i>       | Up (1.5)                        |
|                       |                                 |            | <i>METTL24</i>     | Up (1.2)                        |
|                       |                                 |            | <i>MFAP2</i>       | Up (1.5)                        |
|                       |                                 |            | <i>NAALADL2</i>    | Up (1.3)                        |
|                       |                                 |            | <i>OGN</i>         | Up (2.2)                        |
|                       |                                 |            | <i>PAMR1</i>       | Up (1.6)                        |
|                       |                                 |            | <i>POSTN</i>       | Up (2.9)                        |
|                       |                                 |            | <i>TNXB</i>        | Up (1.5)                        |
| <i>COL4A1</i>         | Up (1.2)                        |            |                    |                                 |
| <i>COL4A2</i>         | Up (1.2)                        |            |                    |                                 |
| <i>LOX</i>            | Up (1.2)                        |            |                    |                                 |
| <i>TGFB2</i>          | Up (1.3)                        |            |                    |                                 |
| 37                    | Lungs from PAH patients         | Affymetrix | <i>PII5</i>        | Up (4.3)                        |
|                       |                                 |            | <i>POSTN</i>       | Up (5.3)                        |
|                       |                                 |            | <b><i>SPP1</i></b> | <b>Up (3.6)</b>                 |
| 75                    | Lungs from rats (hypoxia model) | Illumina   | <i>COL4A1</i>      | Up (1.9)                        |
|                       |                                 |            | <i>FNI</i>         | Up (1.3)                        |
|                       |                                 |            | <b><i>SPP1</i></b> | <b>Up (1.3)</b>                 |
|                       |                                 |            | <i>THBS4</i>       | Up (1.3)                        |
|                       |                                 |            | <i>TNC</i>         | Up (1.5)                        |
|                       |                                 |            | <i>VTN</i>         | Up (1.3)                        |

**Table S3: List of semi-tryptic peptides informing assignment of putative ADAMTS8 cleavage sites in OPN.** Putative cleavage sites are between the residues in bold, note that the other end of each peptide is tryptic. A ratio of "100" indicates a peptide found only in the WT digests, and a ratio of "0.01" indicates a peptide found only in the EQ digest. # indicates amino acid cyclization (Q), † indicates amino acid oxidation (M).

| Digest Time | Annotated sequence           | XCorr score | Peptide position | P1   | P1'  | WT/EQ ratio | z - score |
|-------------|------------------------------|-------------|------------------|------|------|-------------|-----------|
| 2 h         | [D].DQSAETHSHK               | 2.06        | 218-227          | D217 | D218 | 100         | 2.87      |
| 2 h         | GKDSYETSQLDDQSAETHSHKQ.[S]   | 4.87        | 207-228          | Q228 | S229 | 100         | 2.69      |
| 2 h         | #QLYNKYPDAVATWLNPDPSQKQN.[L] | 7.65        | 31-53            | N53  | L54  | 100         | 2.87      |
| 2 h         | QLYNKYPDAVATWLNPDPSQKQN.[L]  | 2.37        | 31-53            | N53  | L54  | 100         | 2.87      |
| 2 h         | [Q].SAETHSHK                 | 2.86        | 220-227          | Q219 | S220 | 0.01        | 3.73      |
| 24 h        | [D].DQSAETHSHK               | 2.1         | 218-227          | D217 | D218 | 100         | 2.69      |
| 24 h        | [E].FHSBEDMLVVDPK            | 4.09        | 264-276          | E263 | F264 | 100         | 2.69      |
| 24 h        | GKDSYETSQLDDQSAETHS.[H]      | 7.84        | 207-225          | S225 | H226 | 100         | 2.69      |
| 24 h        | GKDSYETSQLDDQSAETHSH.[S]     | 7.25        | 207-226          | H226 | S227 | 100         | 2.69      |
| 24 h        | GKDSYETSQLDDQSAETHSHKQS.[R]  | 2.61        | 207-229          | S229 | R230 | 100         | 2.69      |
| 24 h        | [F].HSHED†MLVVDPK            | 2.61        | 265-276          | F264 | H265 | 100         | 2.69      |
| 24 h        | [F].HSHEDMLVVDPK             | 3.97        | 265-276          | F264 | H265 | 100         | 2.69      |
| 24 h        | KANDESNEHSDVIDSQE.[L]        | 3.08        | 235-251          | E251 | L252 | 100         | 2.69      |
| 24 h        | [Y].NKYPDAVATWLNPDPSQK       | 5.91        | 34-51            | Y33  | N34  | 100         | 2.69      |
| 24 h        | #QLYNKYPDAVATWLNPDPSQKQN.[L] | 5.37        | 31-53            | N53  | L54  | 100         | 2.69      |
| 24 h        | QLYNKYPDAVATWLNPDPSQKQN.[L]  | 7.51        | 31-53            | N53  | L54  | 100         | 2.69      |
| 24 h        | GKDSYETSQLDDQSAETHSHKQ.[S]   | 7.18        | 207-228          | Q228 | S229 | 45.343      | 2.15      |
| 24 h        | [A].IPVKQADSGSSEEKQLYNK      | 4.08        | 17-35            | A16  | I17  | 0.01        | 3.63      |
| 24 h        | QLYNKYPDAVATWLNPD.[P]        | 2.82        | 31-47            | D47  | P48  | 0.01        | 3.63      |
